# Supplementary material for: Synthesis of trifluoromethyl γ-aminophosphonates by nucleophilic aziridine ring opening
Source: Royal Society of Chemistry journal article supplement (doi:10.1039/c5ob01411e), 2015-01-01
Supplement: c5ob01411e1.pdf [file c5ob01411e1.pdf]

## Supporting Information

### Synthesis of trifluoromethyl $\gamma$ -aminophosphonates by nucleophilic aziridine ring opening

T. Cytlak,<sup>\*a</sup> M. Saweliew,<sup>a</sup> M. Kubicki<sup>a</sup> and H. Koroniak<sup>a</sup>

Faculty of Chemistry, Adam Mickiewicz University, Umultowska 89b, 60614 Poznan (Poland)  
E-mail: cytlak@amu.edu.pl

I)  $^1\text{H}$ ,  $^{13}\text{C}$  and  $^{31}\text{P}$  NMR Spectra of Compounds

II) Crystallographic Data

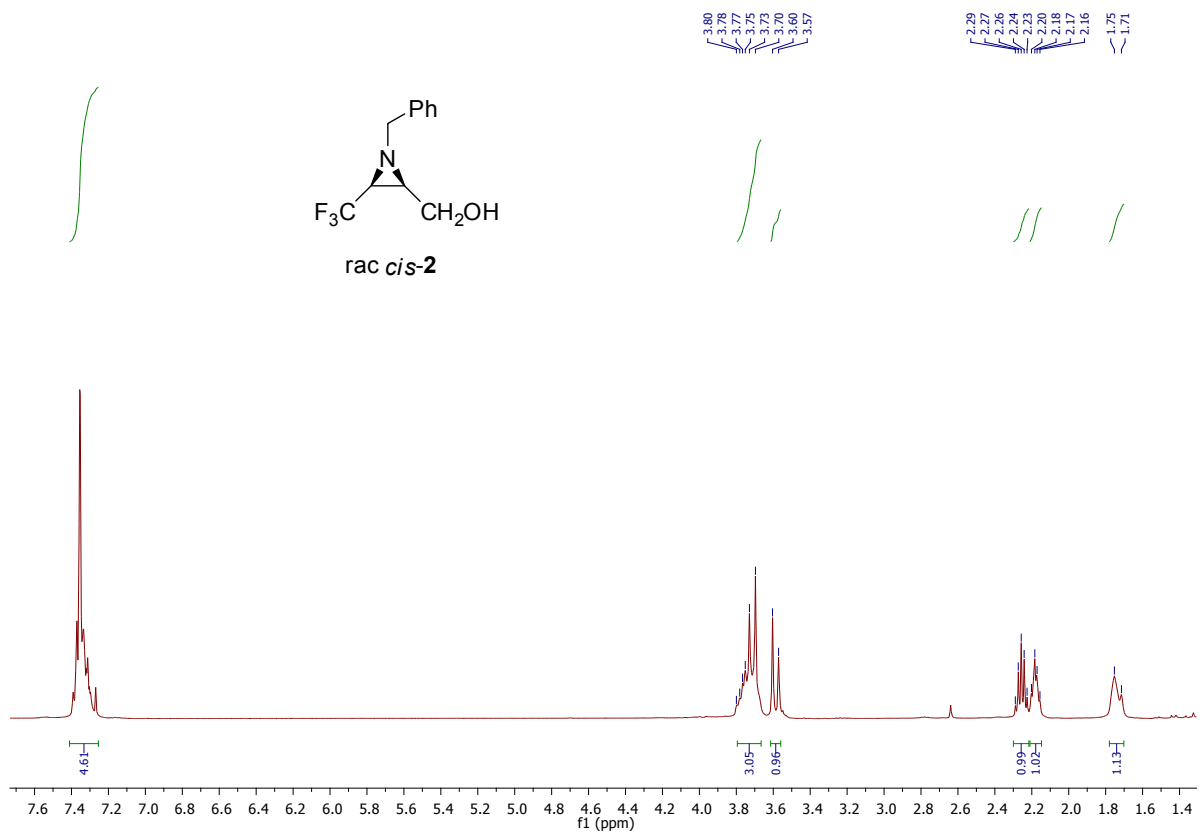

**<sup>1</sup>H NMR of (1-benzyl-3-(trifluoromethyl)aziridin-2-yl)methanol (rac cis-2)**

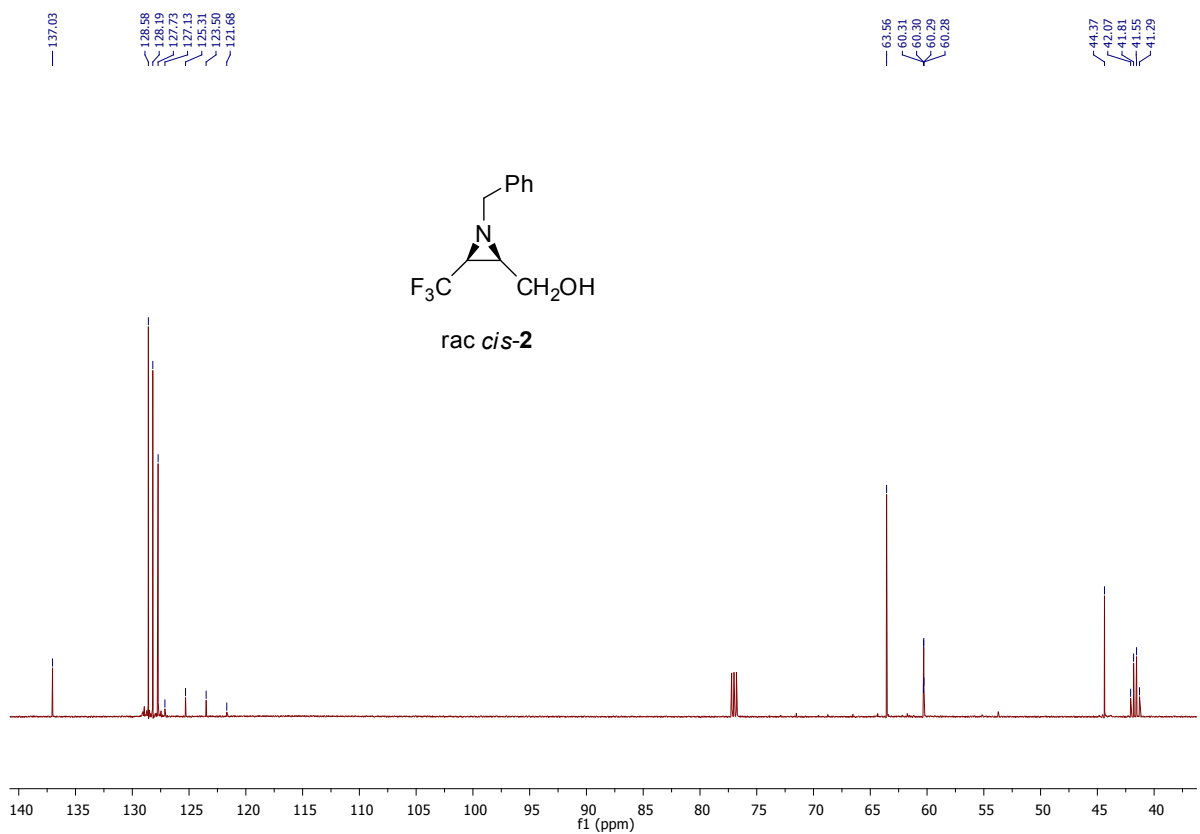

**<sup>13</sup>C NMR of (1-benzyl-3-(trifluoromethyl)aziridin-2-yl)methanol (rac cis-2)**

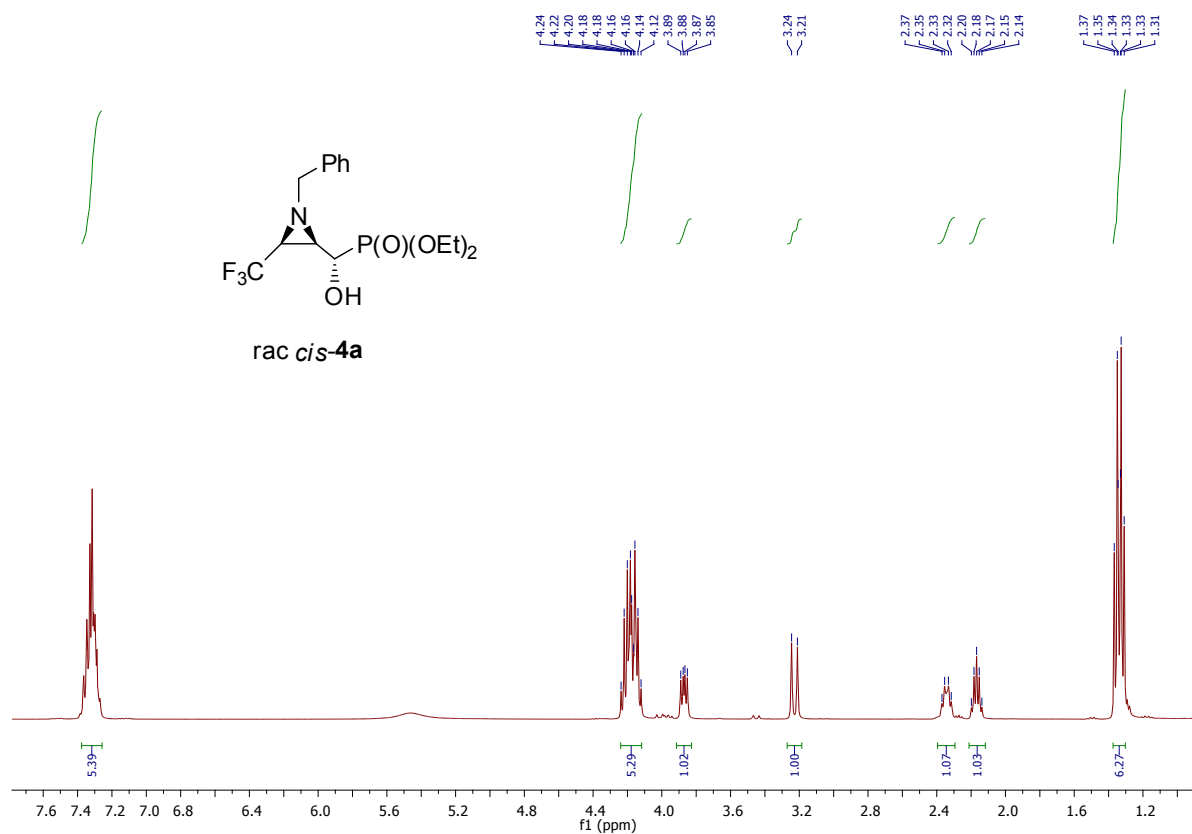

**<sup>1</sup>H NMR of diethyl 1-benzyl-3-(trifluoromethyl)aziridin-2-yl)(hydroxy)methylphosphonate (rac cis-4a)**

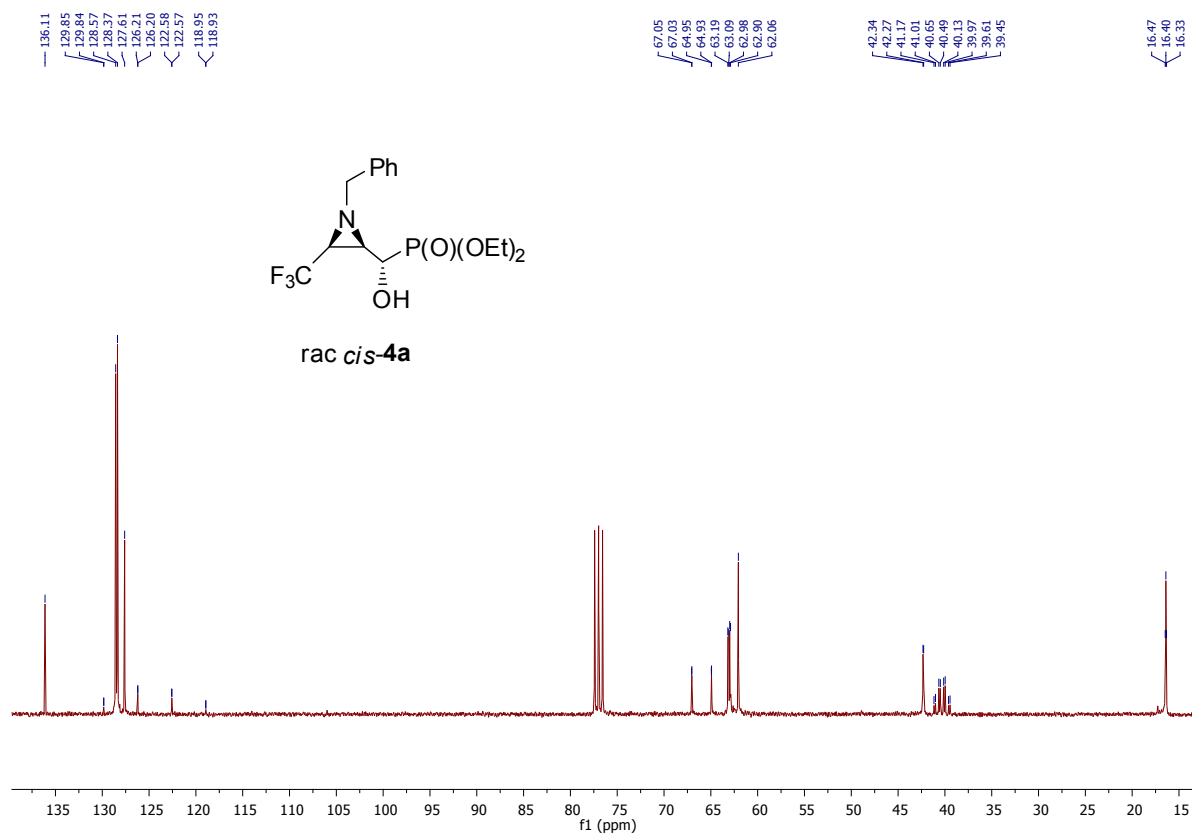

**<sup>13</sup>C NMR of diethyl 1-benzyl-3-(trifluoromethyl)aziridin-2-yl)(hydroxy)methylphosphonate (rac cis-4a)**

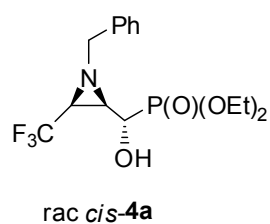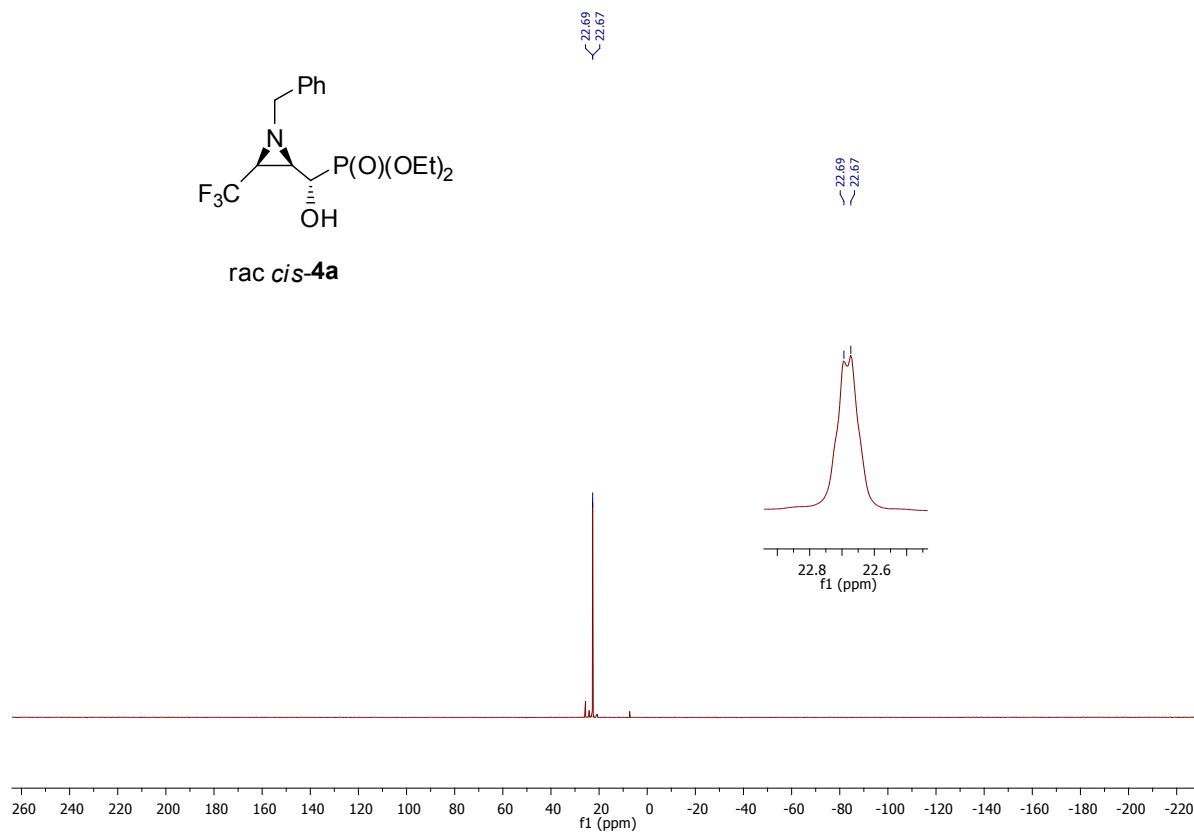

<sup>31</sup>P NMR of diethyl 1-benzyl-3-(trifluoromethyl)aziridin-2-yl)(hydroxy)methylphosphonate (rac *cis*-4a)

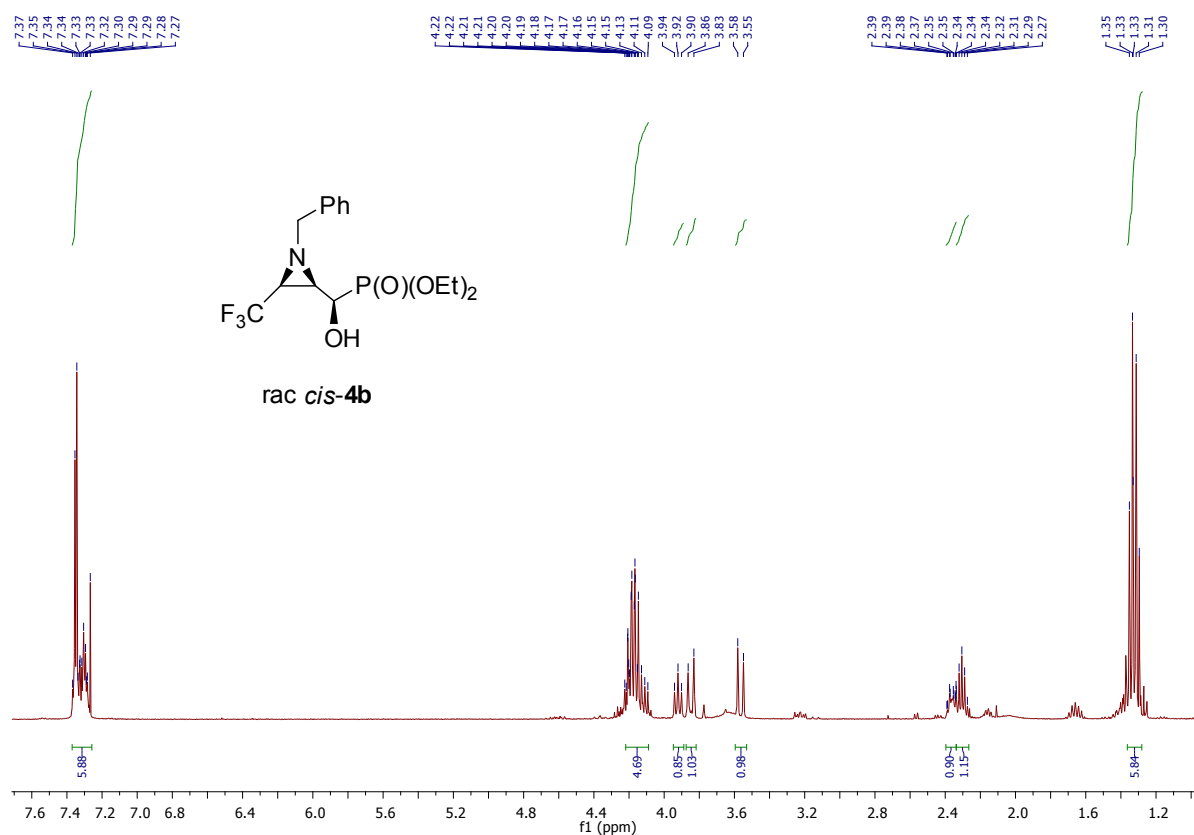

<sup>1</sup>H NMR of diethyl 1-benzyl-3-(trifluoromethyl)aziridin-2-yl)(hydroxy)methylphosphonate (rac *cis*-4b)

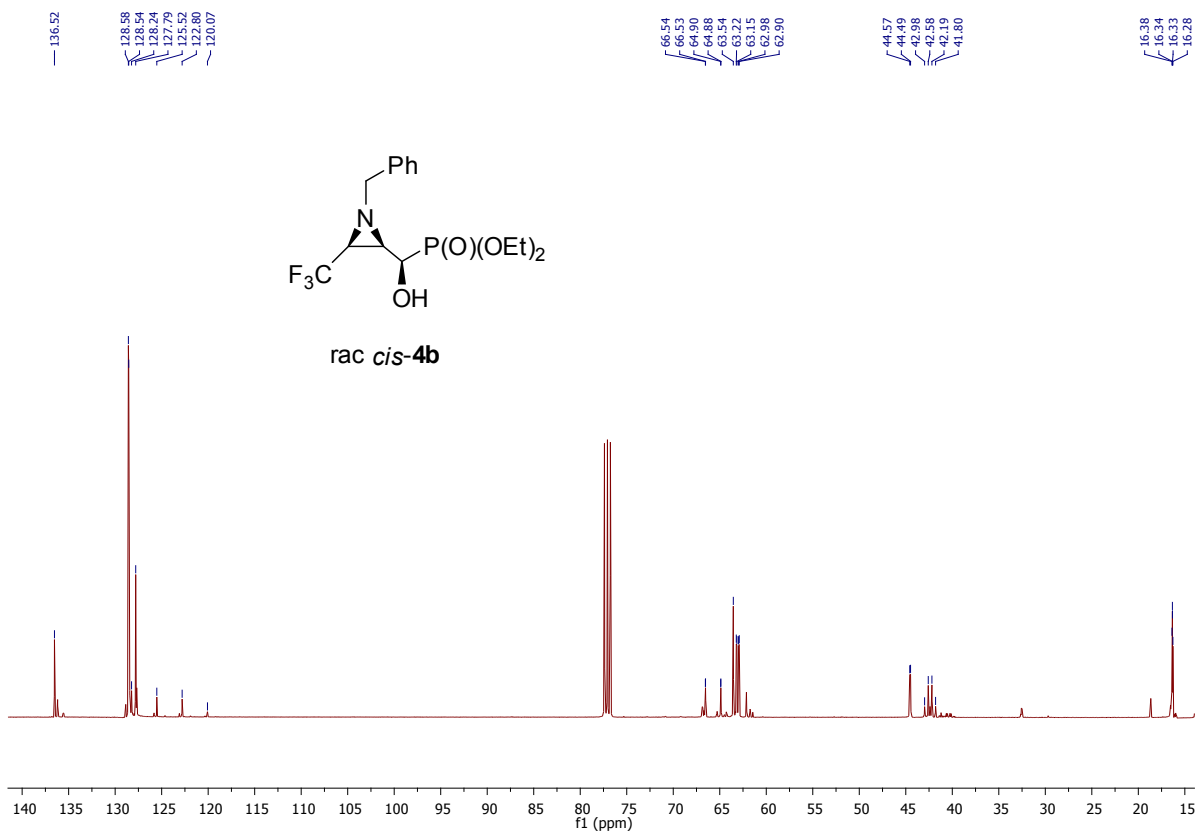

**<sup>13</sup>C NMR of diethyl 1-benzyl-3-(trifluoromethyl)aziridin-2-yl(hydroxy)methylphosphonate (rac cis-4b)**

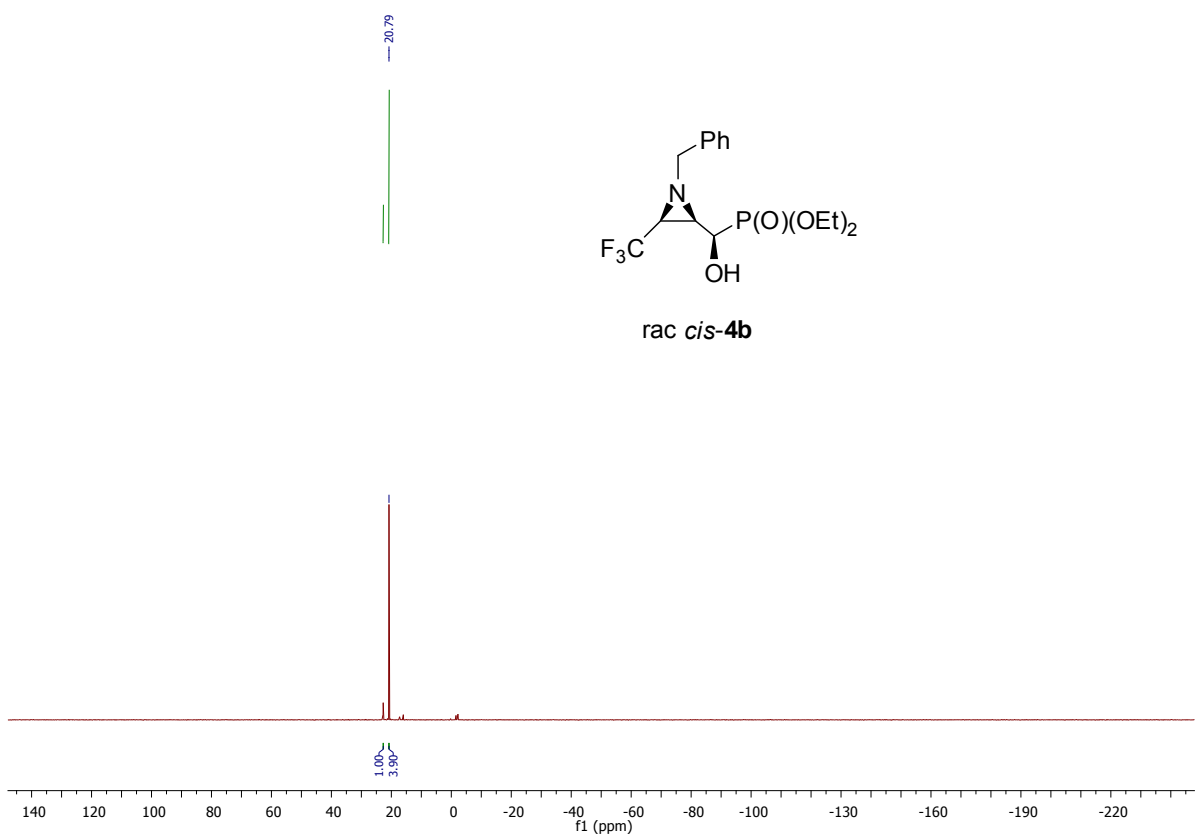

**<sup>31</sup>P NMR of diethyl 1-benzyl-3-(trifluoromethyl)aziridin-2-yl(hydroxy)methylphosphonate (rac cis-4b)**

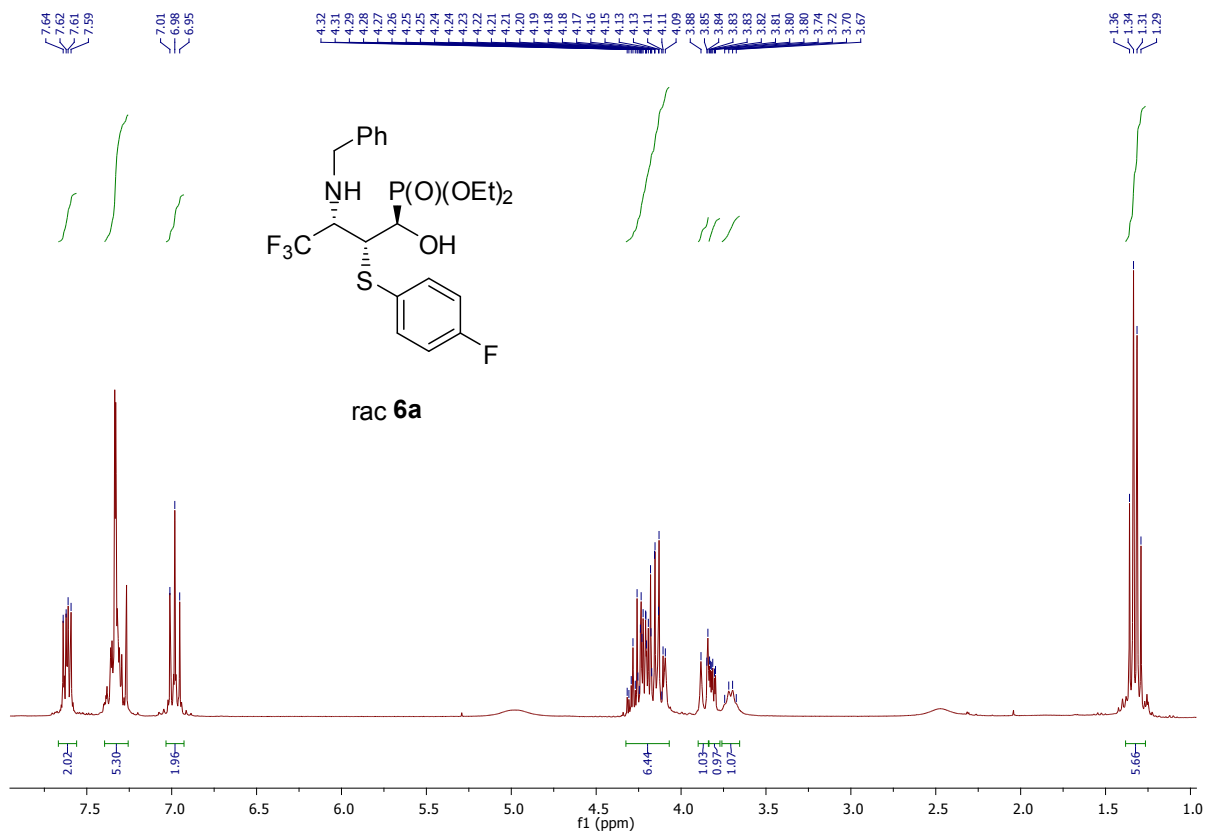

<sup>1</sup>H NMR of diethyl 3-(benzylamino)-4,4,4-trifluoro-2-(4-fluorophenylthio)-1-hydroxybutylphosphonate (**rac 6a**)

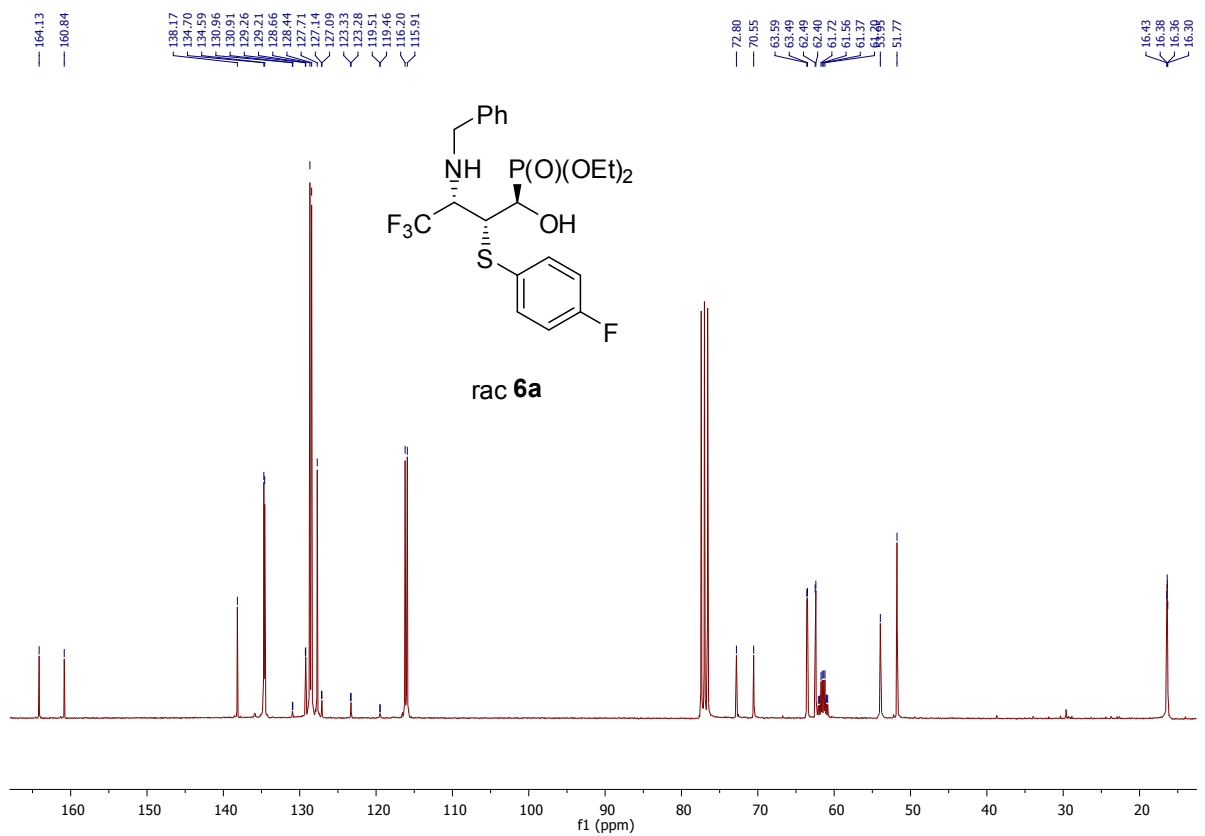

<sup>13</sup>C NMR of diethyl 3-(benzylamino)-4,4,4-trifluoro-2-(4-fluorophenylthio)-1-hydroxybutylphosphonate (**rac 6a**)

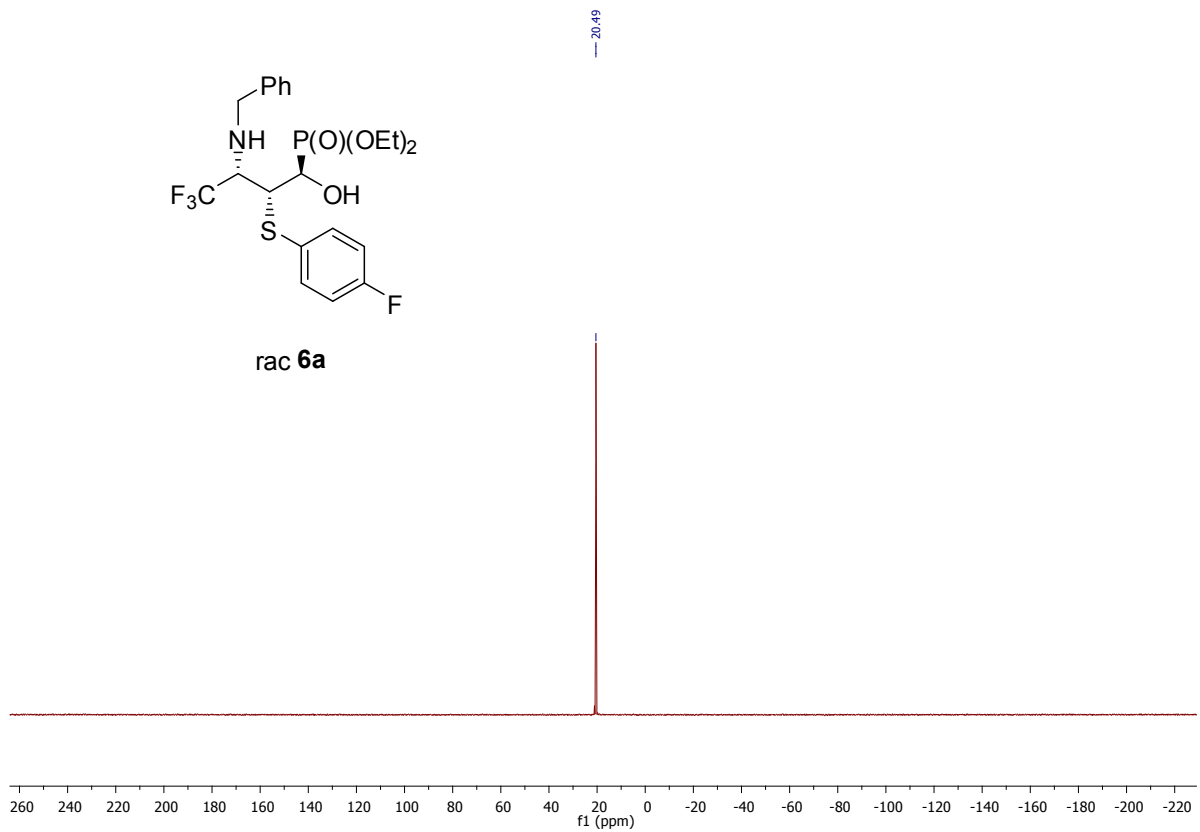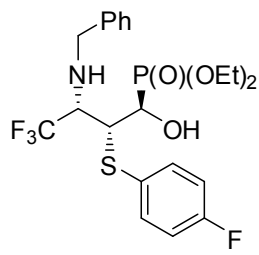

rac 6a

<sup>31</sup>P NMR of diethyl 3-(benzylamino)-4,4,4-trifluoro-2-(4-fluorophenylthio)-1-hydroxybutylphosphonate (rac 6a)

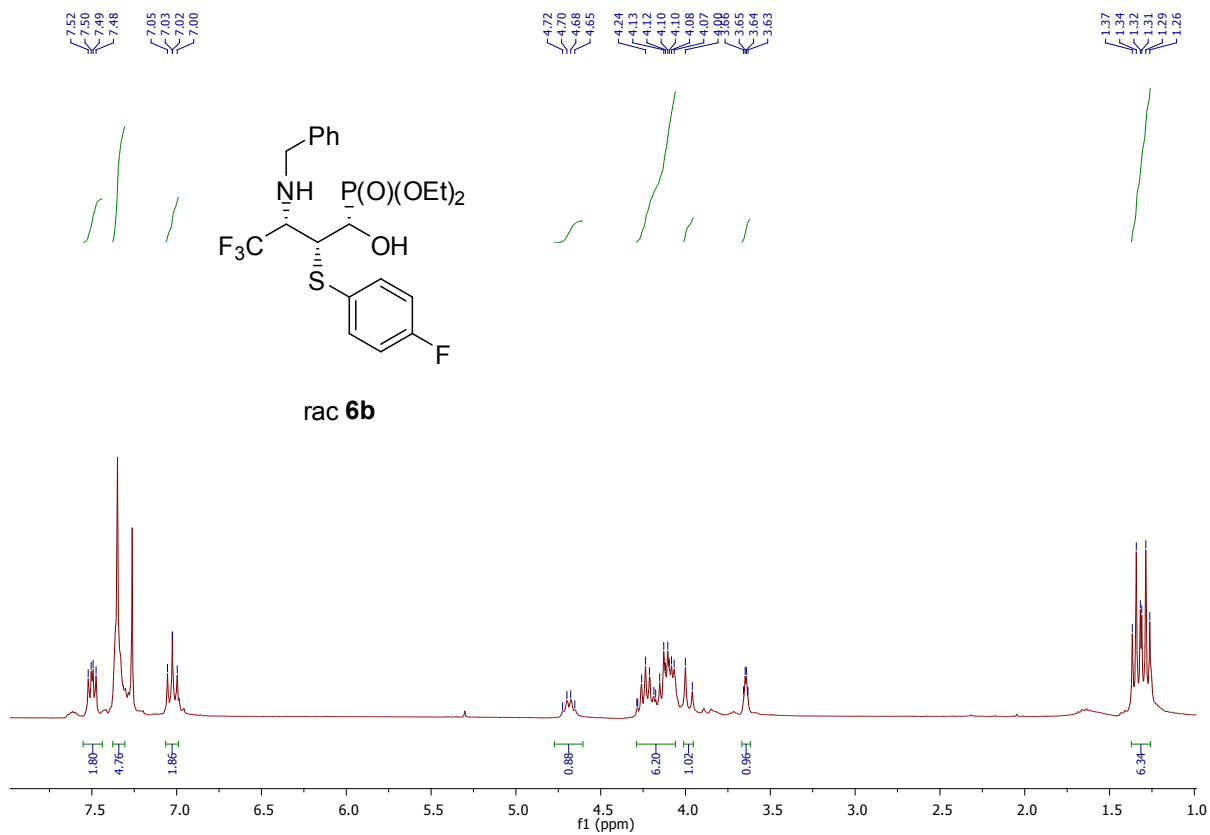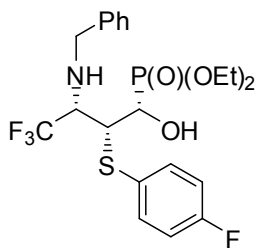

rac 6b

<sup>1</sup>H NMR of diethyl 3-(benzylamino)-4,4,4-trifluoro-2-(4-fluorophenylthio)-1-hydroxybutylphosphonate (rac 6b)

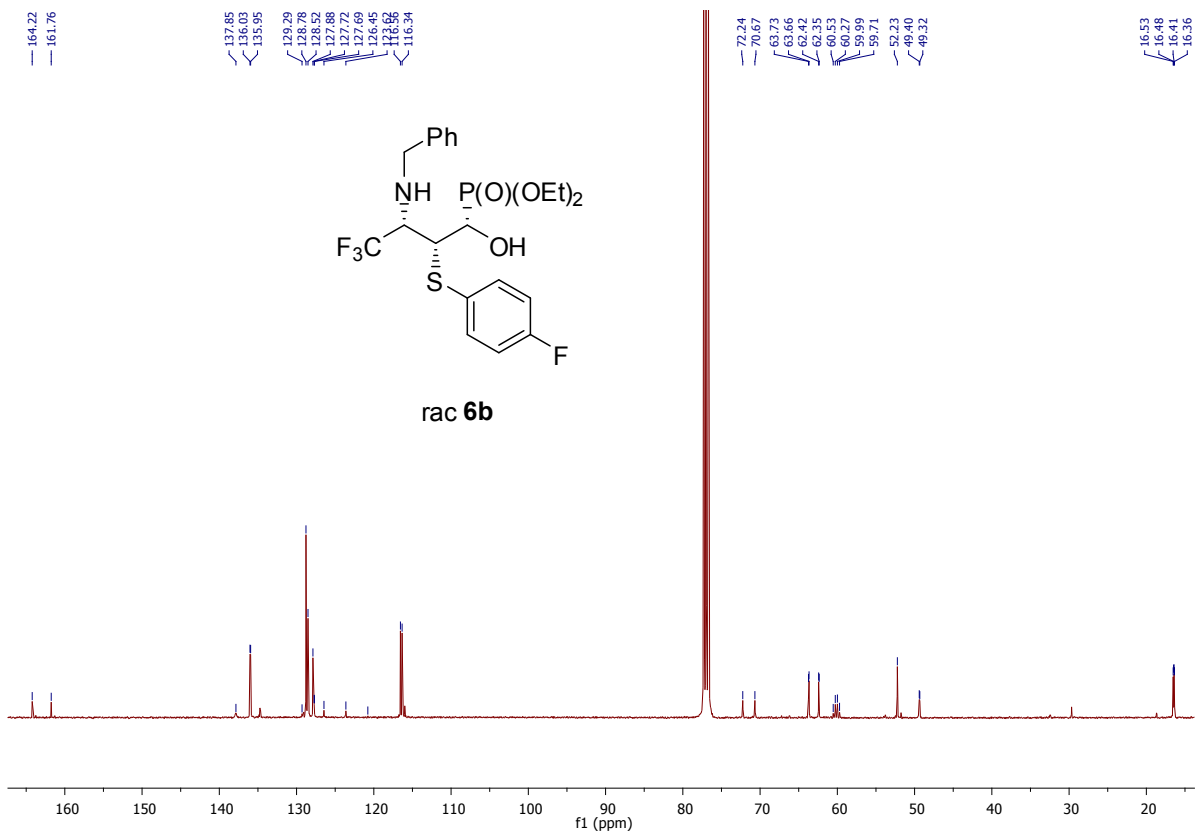

$^{13}\text{C}$  NMR of diethyl 3-(benzylamino)-4,4,4-trifluoro-2-(4-fluorophenylthio)-1-hydroxybutylphosphonate (**rac 6b**)

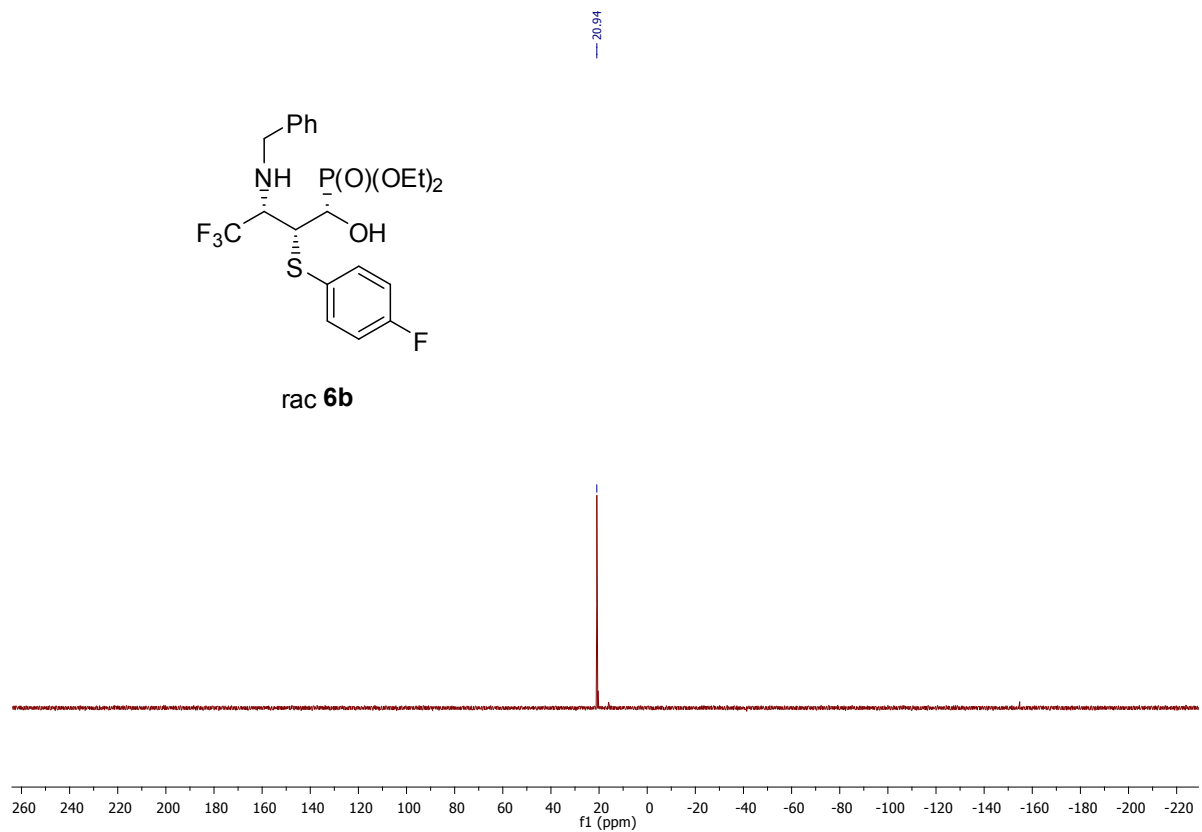

$^{31}\text{P}$  NMR of diethyl 3-(benzylamino)-4,4,4-trifluoro-2-(4-fluorophenylthio)-1-hydroxybutylphosphonate (**rac 6b**)



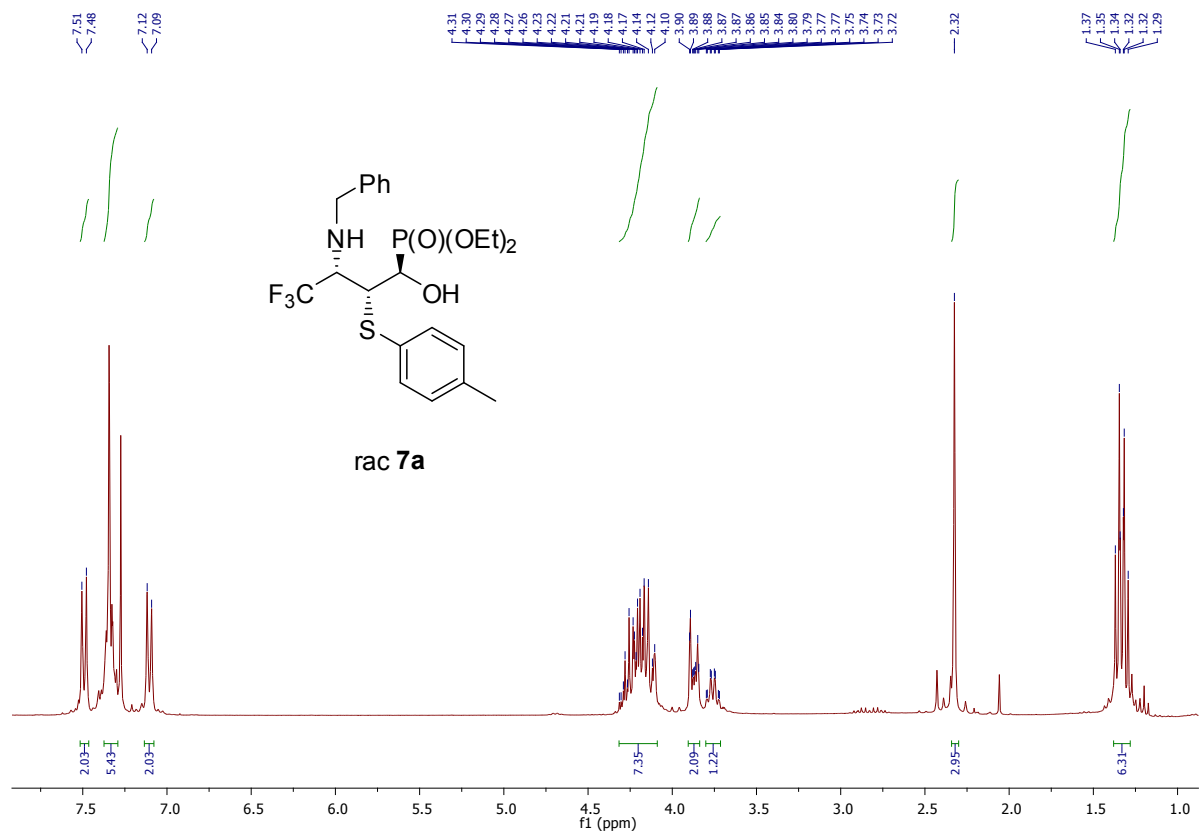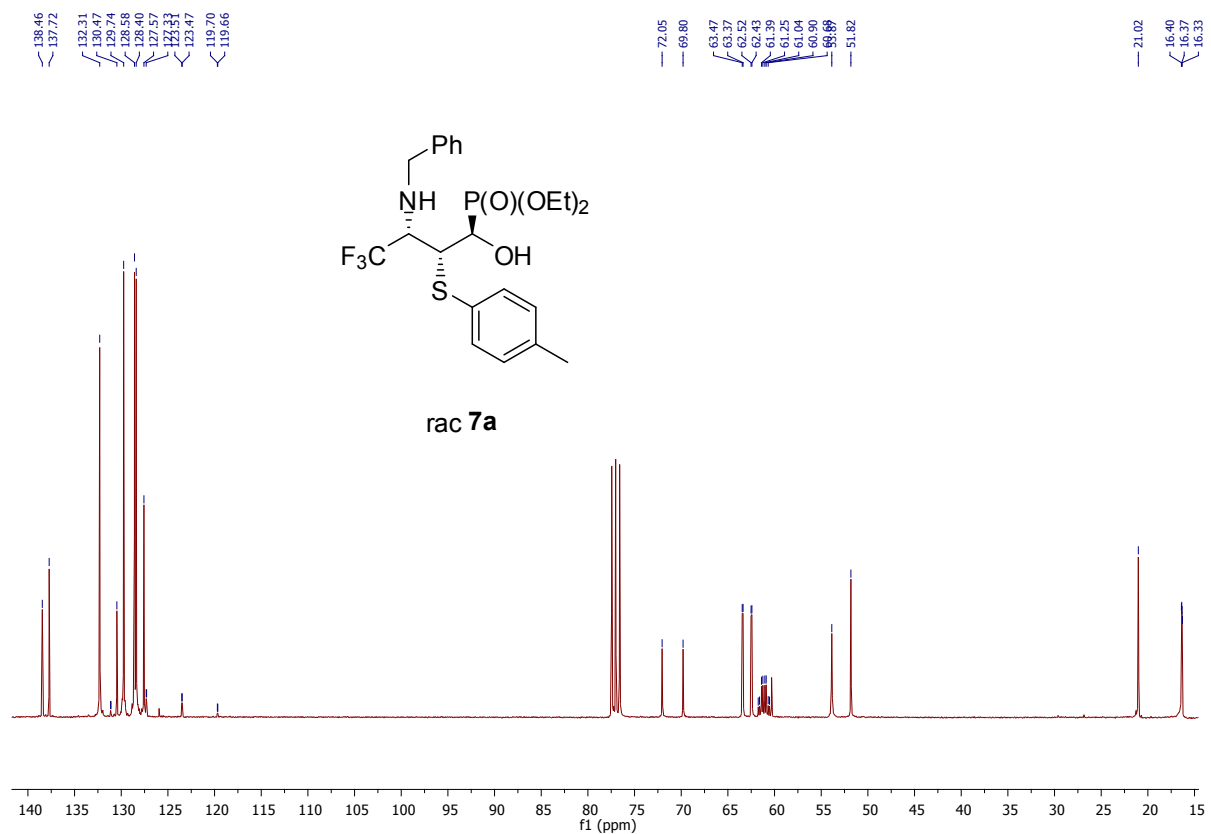

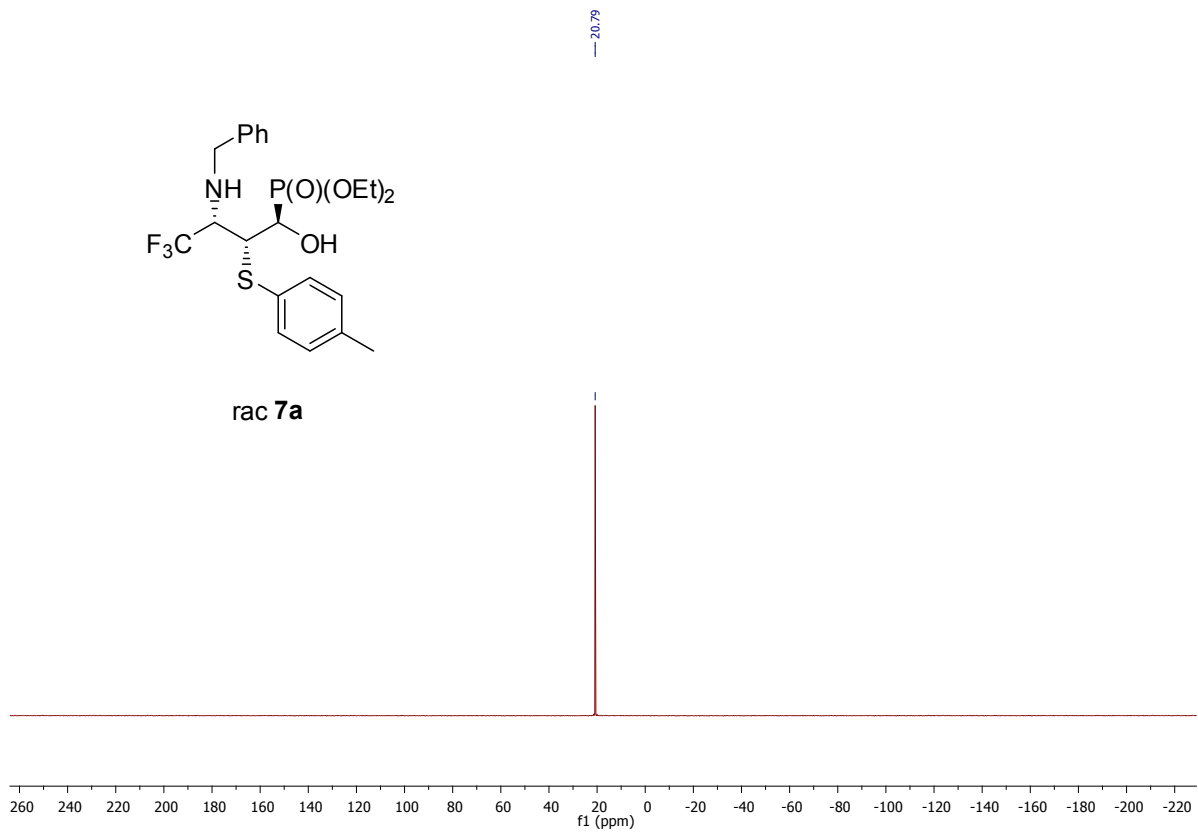

**<sup>31</sup>P NMR of diethyl 3-(benzylamino)-4,4,4-trifluoro-1-hydroxy-2-(*p*-tolylthio)butylphosphonate (rac 7a)**

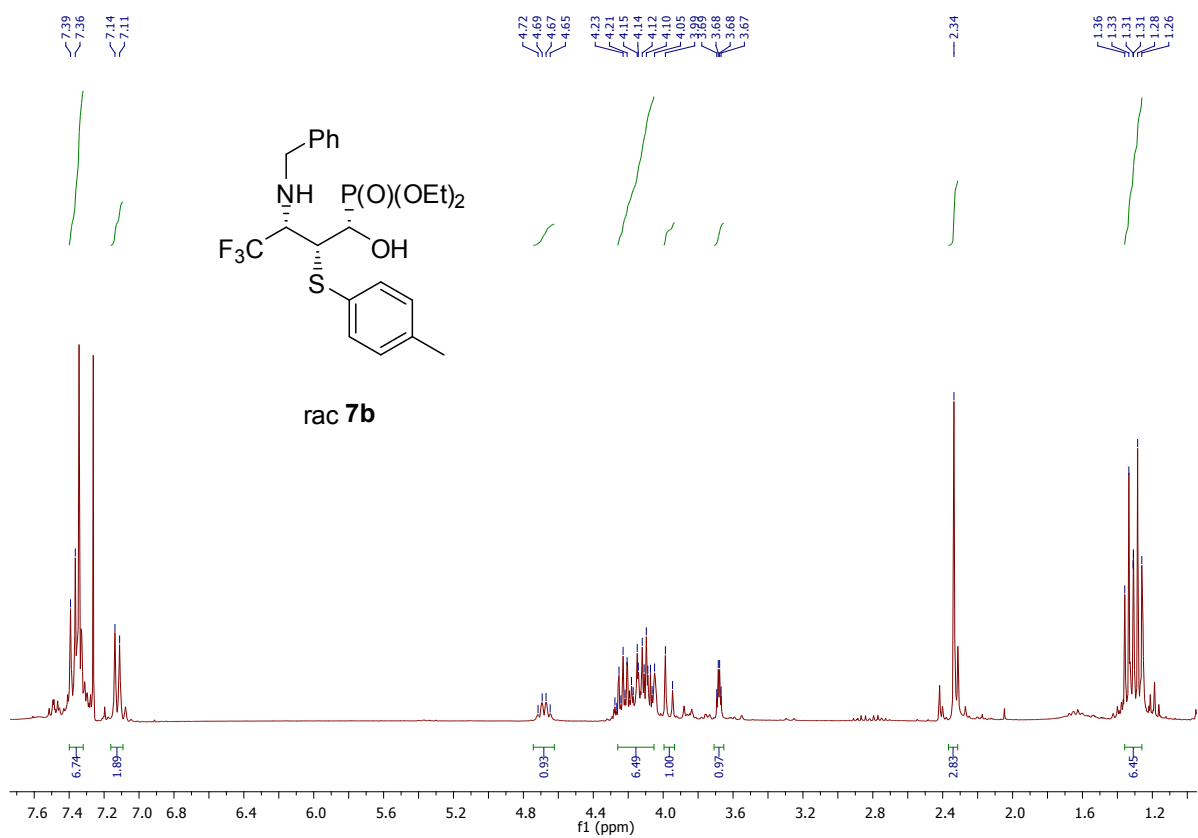

**<sup>1</sup>H NMR of diethyl 3-(benzylamino)-4,4,4-trifluoro-1-hydroxy-2-(*p*-tolylthio)butylphosphonate (rac 7b)**

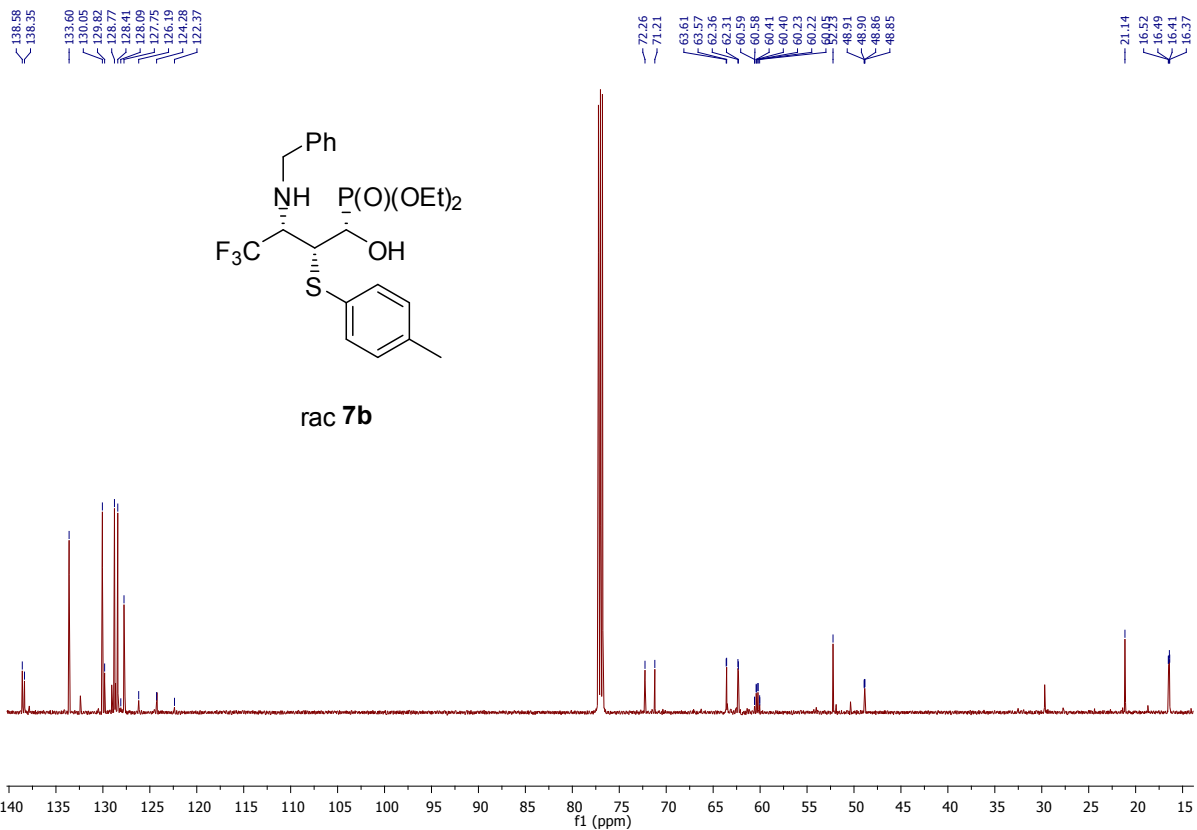

<sup>13</sup>C NMR of diethyl 3-(benzylamino)-4,4,4-trifluoro-1-hydroxy-2-(*p*-tolylthio)butylphosphonate (**rac 7b**)

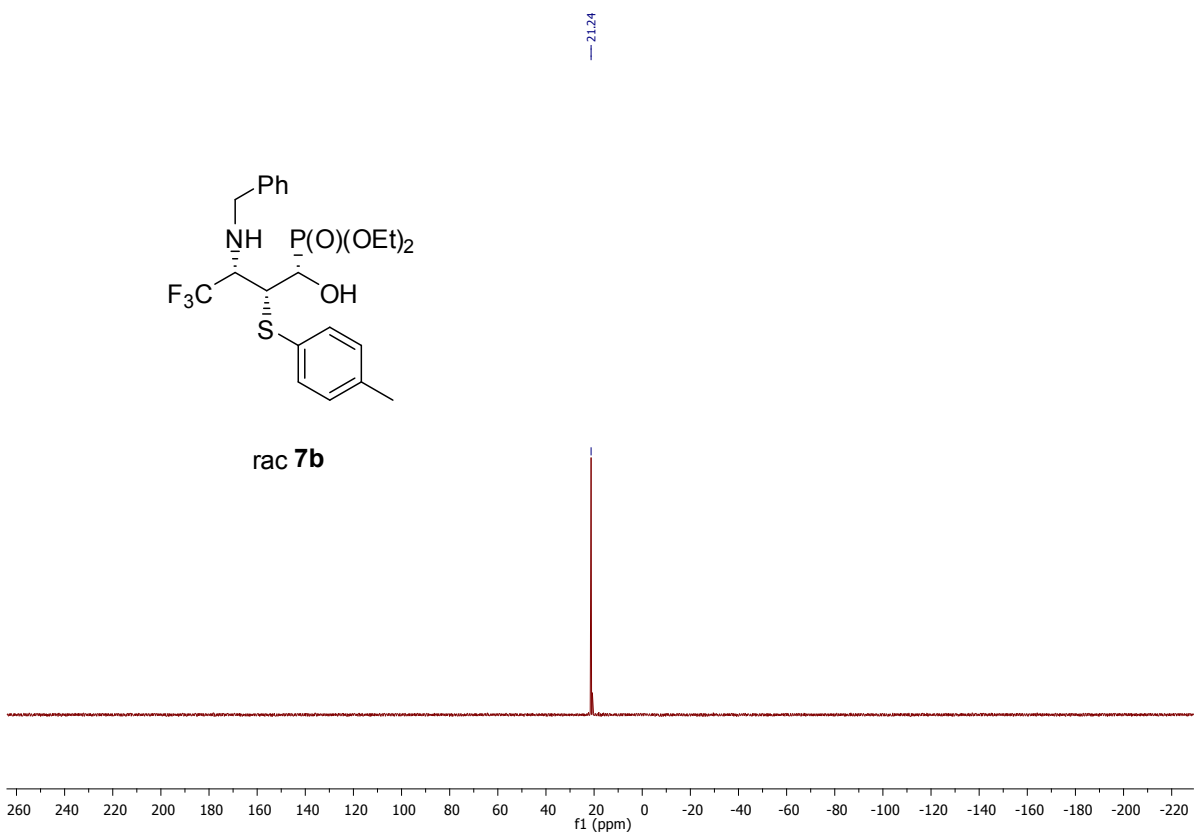

<sup>31</sup>P NMR of diethyl 3-(benzylamino)-4,4,4-trifluoro-1-hydroxy-2-(*p*-tolylthio)butylphosphonate (**rac 7b**)

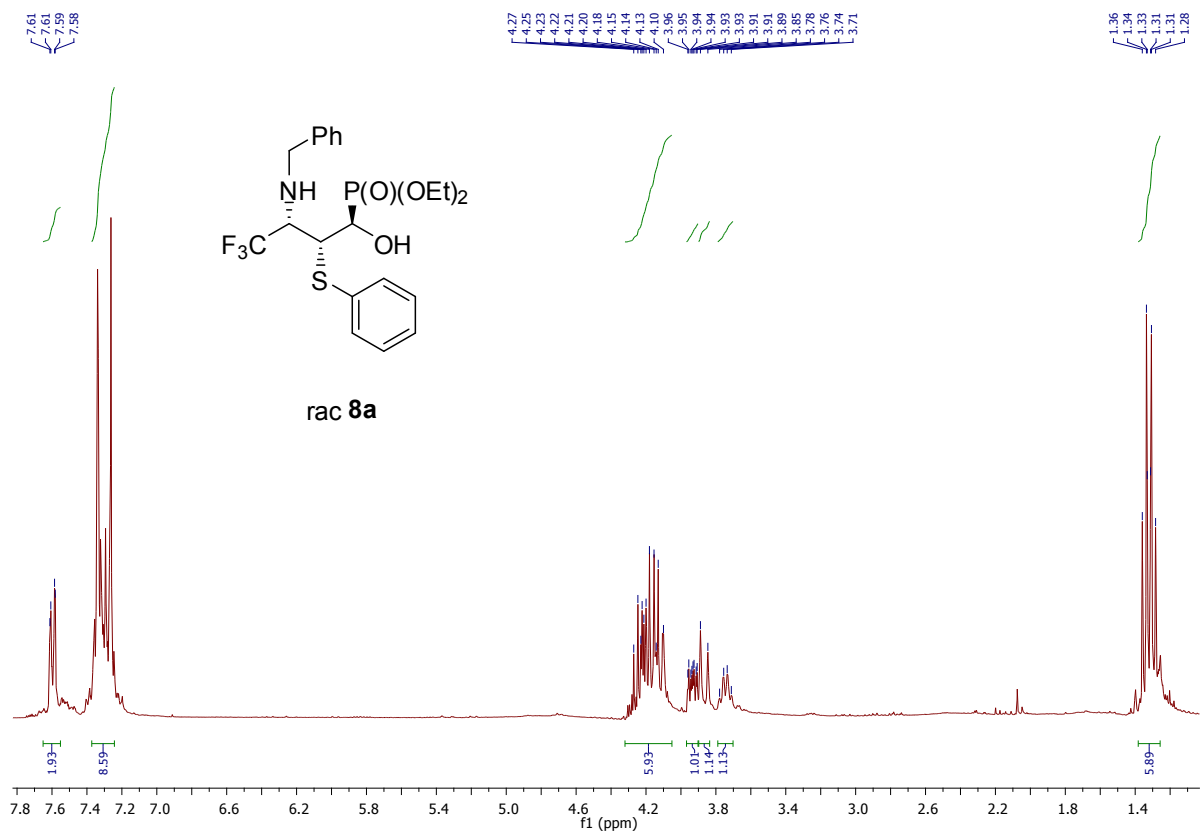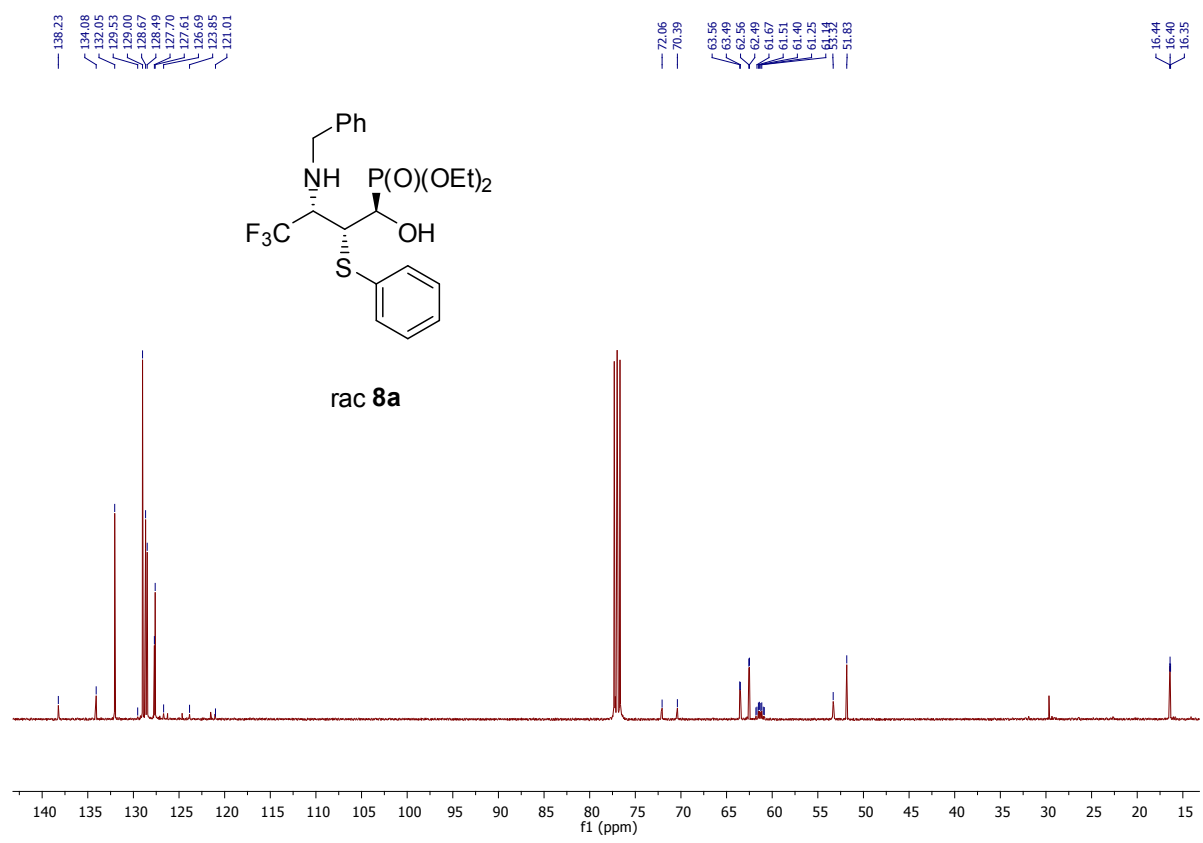

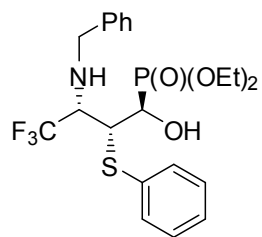

rac 8a

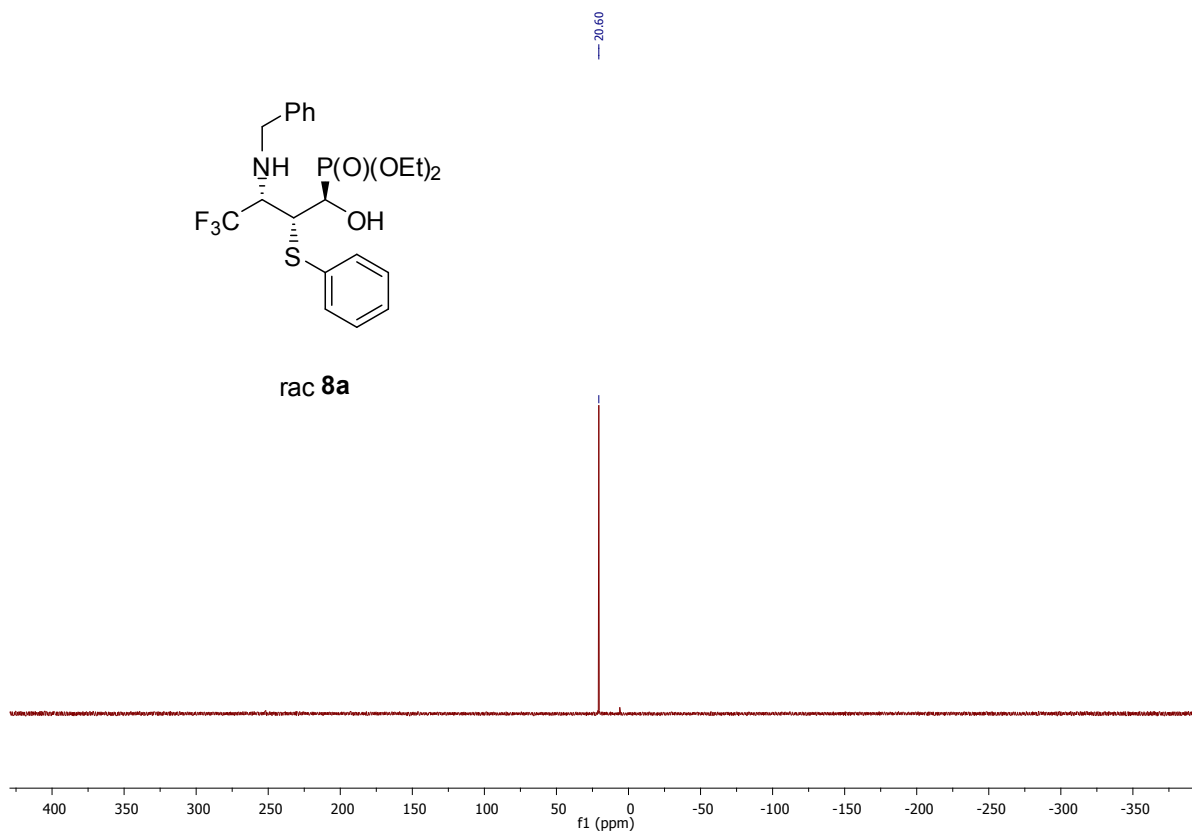

<sup>31</sup>P NMR of diethyl 3-(benzylamino)-4,4,4-trifluoro-1-hydroxy-2-(phenylthio)butylphosphonate (rac 8a)

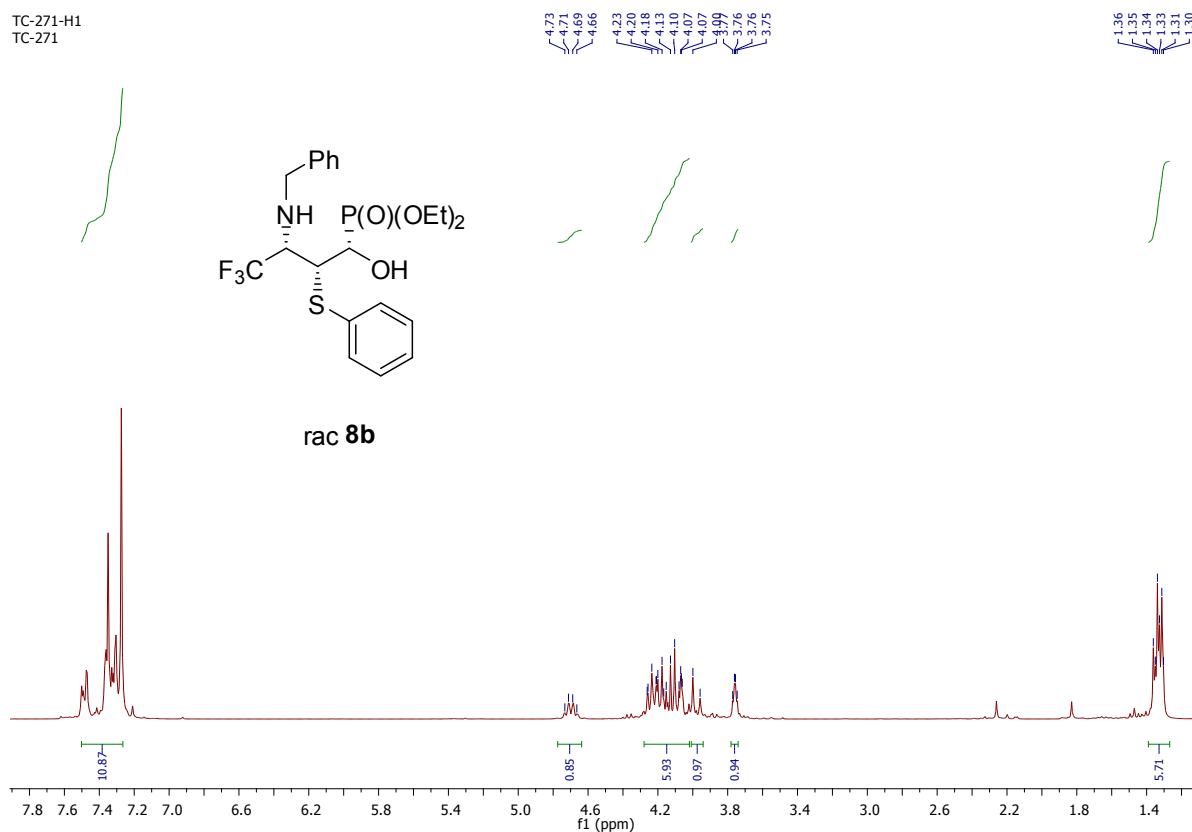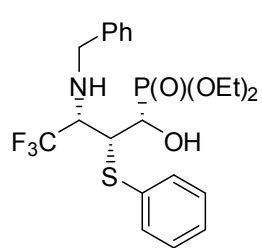

rac 8b

<sup>1</sup>H NMR of diethyl 3-(benzylamino)-4,4,4-trifluoro-1-hydroxy-2-(phenylthio)butylphosphonate (rac 8b)

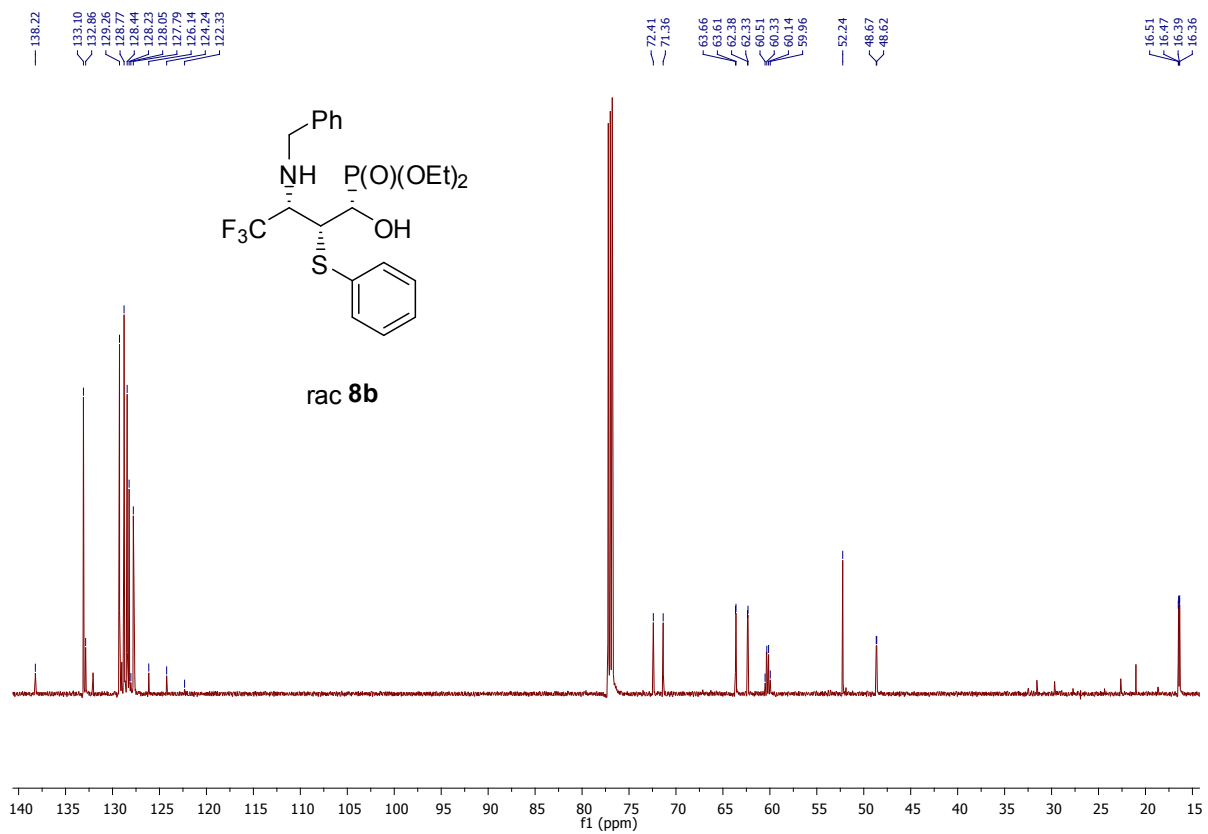

<sup>13</sup>C NMR of diethyl 3-(benzylamino)-4,4,4-trifluoro-1-hydroxy-2-(phenylthio)butylphosphonate (**rac 8b**)

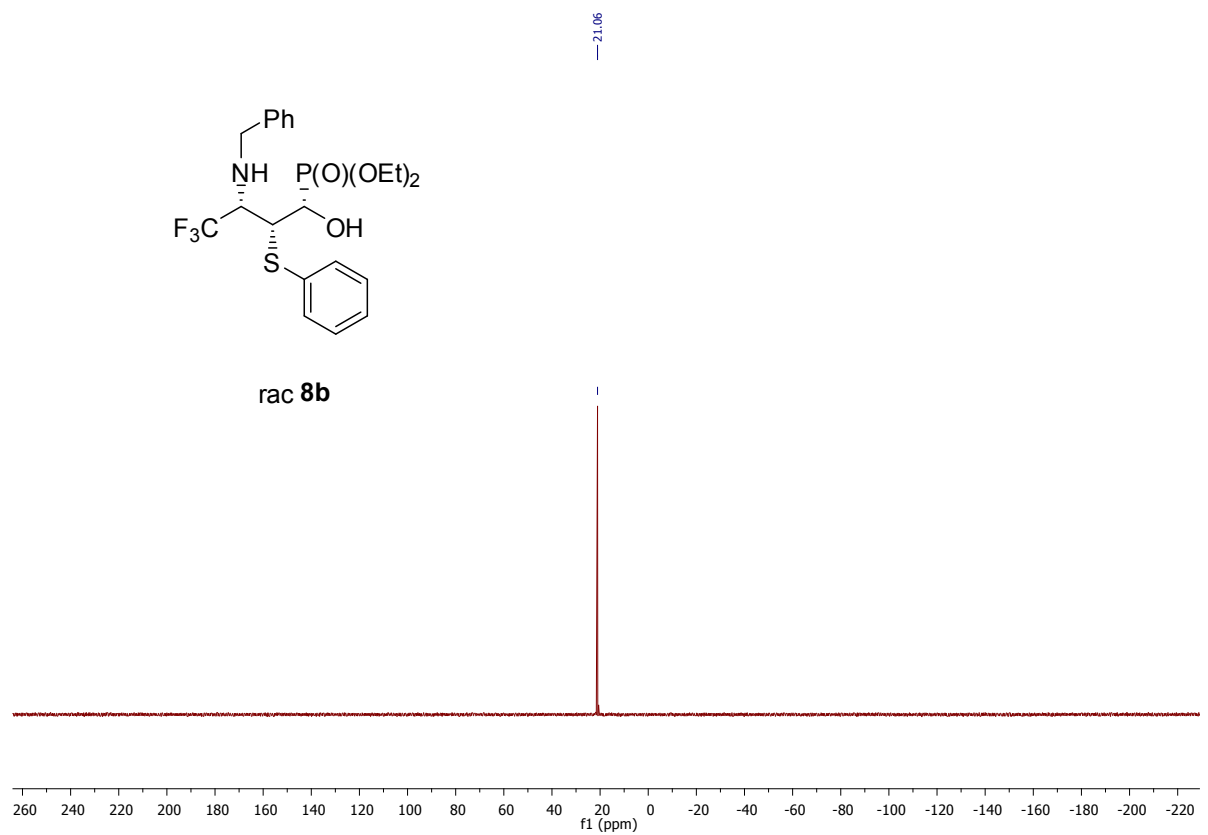

<sup>31</sup>P NMR of diethyl 3-(benzylamino)-4,4,4-trifluoro-1-hydroxy-2-(phenylthio)butylphosphonate (**rac 8b**)

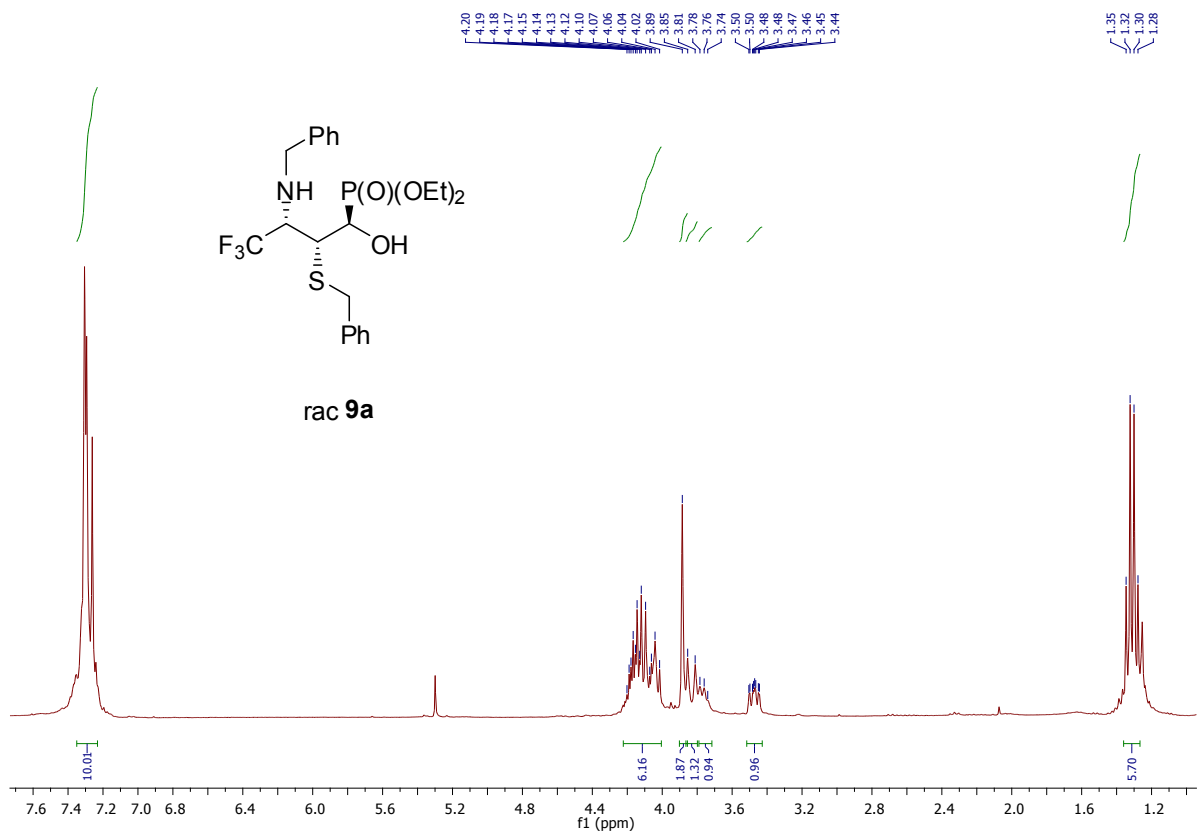

**<sup>1</sup>H NMR of diethyl 3-(benzylamino)-2-(benzylthio)-4,4,4-trifluoro-1-hydroxybutylphosphonate (rac 9a)**

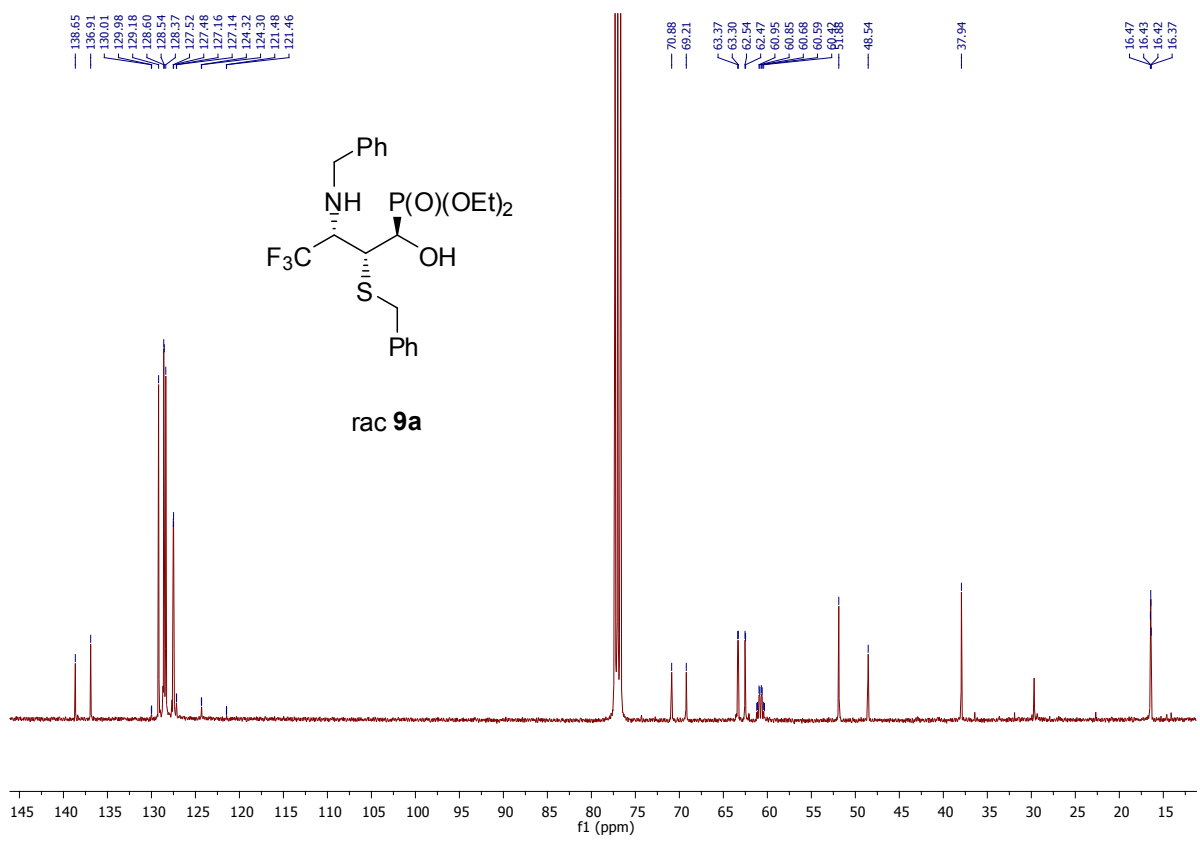

**<sup>13</sup>C NMR of diethyl 3-(benzylamino)-2-(benzylthio)-4,4,4-trifluoro-1-hydroxybutylphosphonate (rac 9a)**

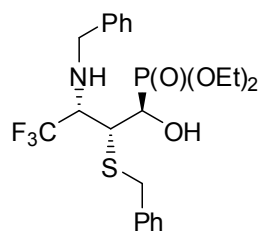

rac **9a**

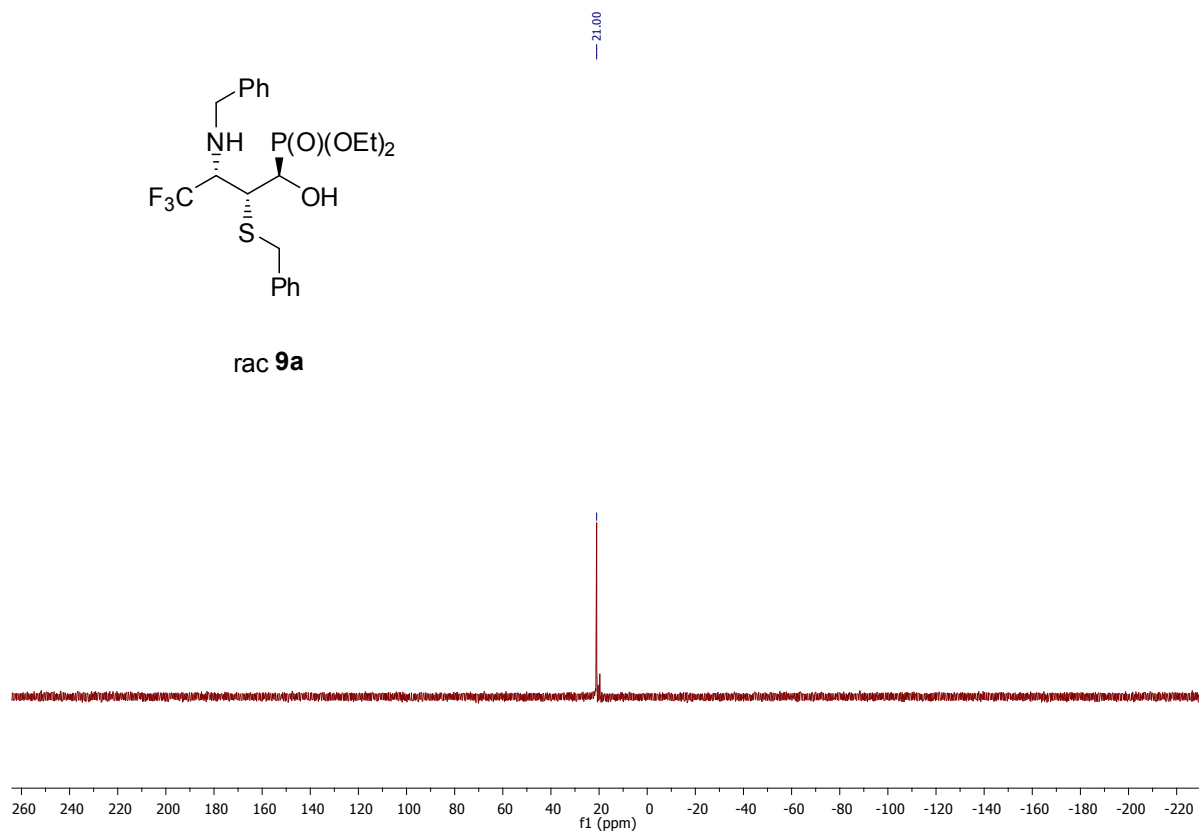

$^{31}\text{P}$  NMR of diethyl 3-(benzylamino)-2-(benzylthio)-4,4,4-trifluoro-1-hydroxybutylphosphonate (rac **9a**)

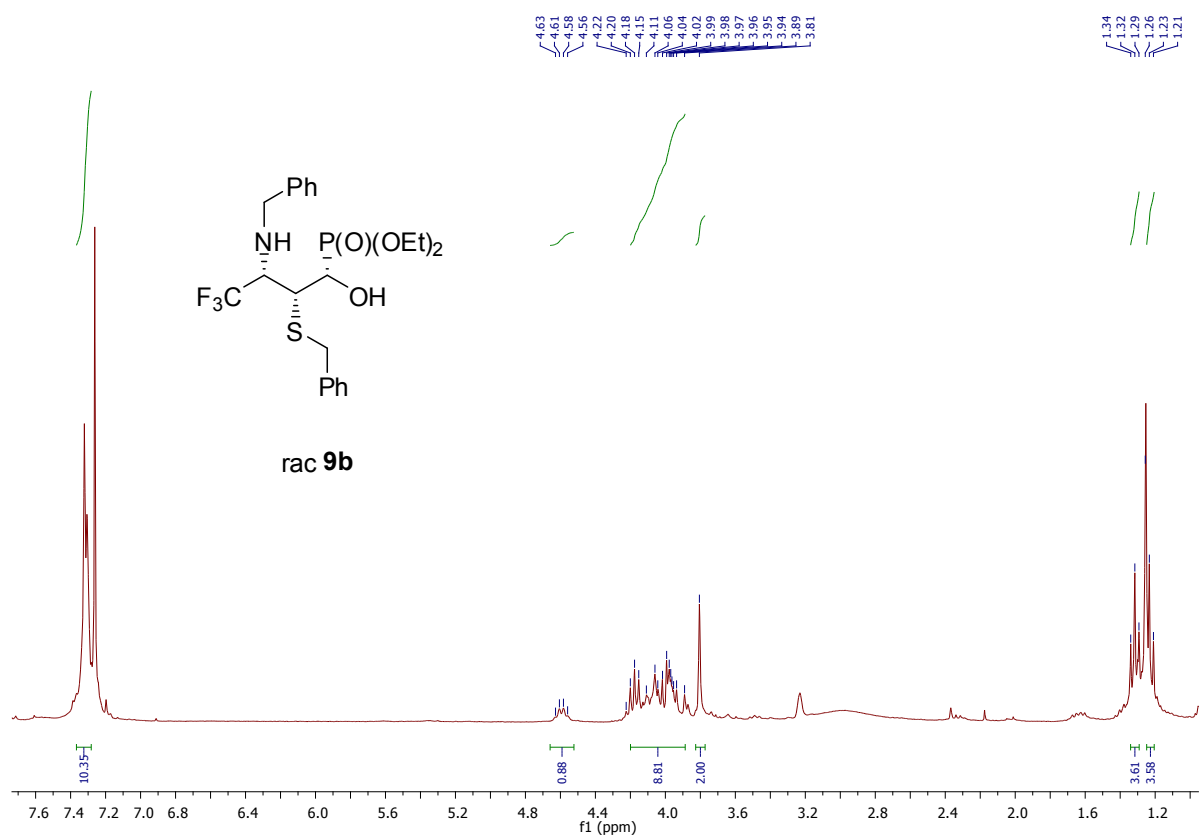

$^1\text{H}$  NMR of diethyl 3-(benzylamino)-2-(benzylthio)-4,4,4-trifluoro-1-hydroxybutylphosphonate (rac **9b**)



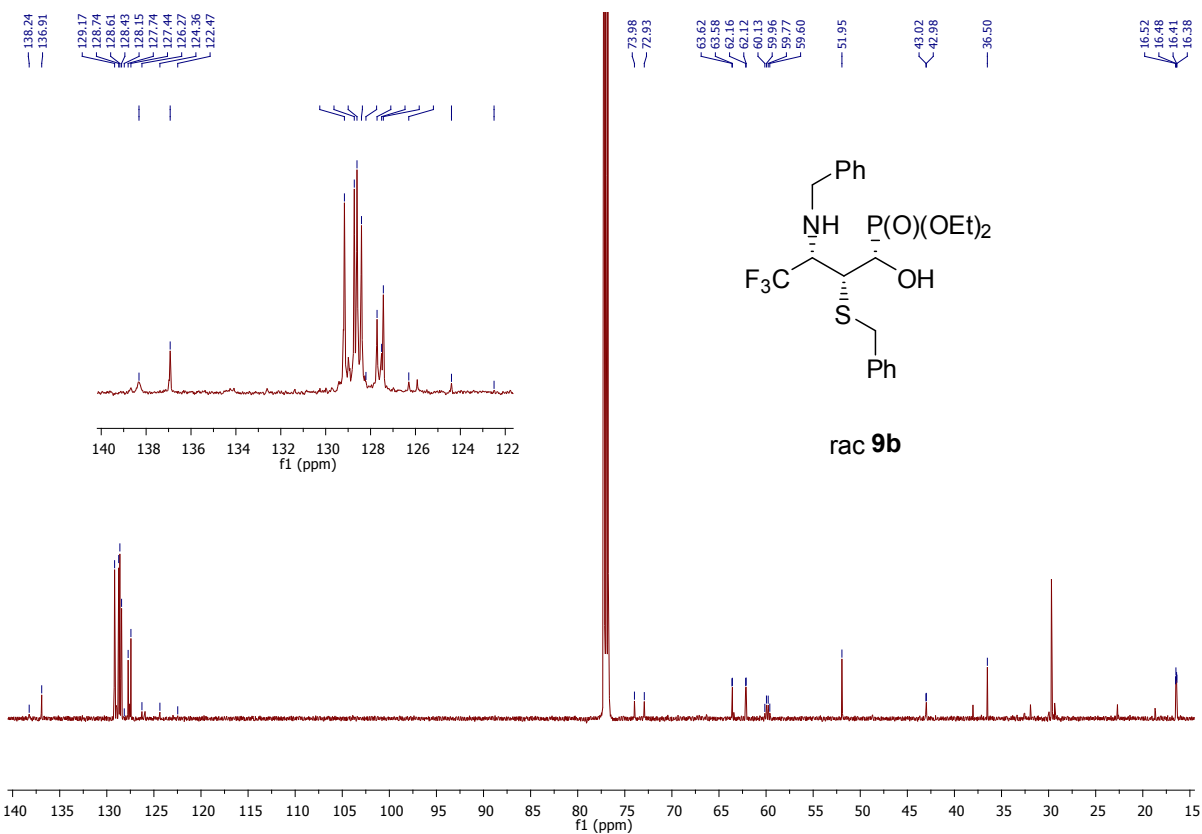

$^{13}\text{C}$  NMR of diethyl 3-(benzylamino)-2-(benzylthio)-4,4,4-trifluoro-1-hydroxybutylphosphonate (**rac 9b**)

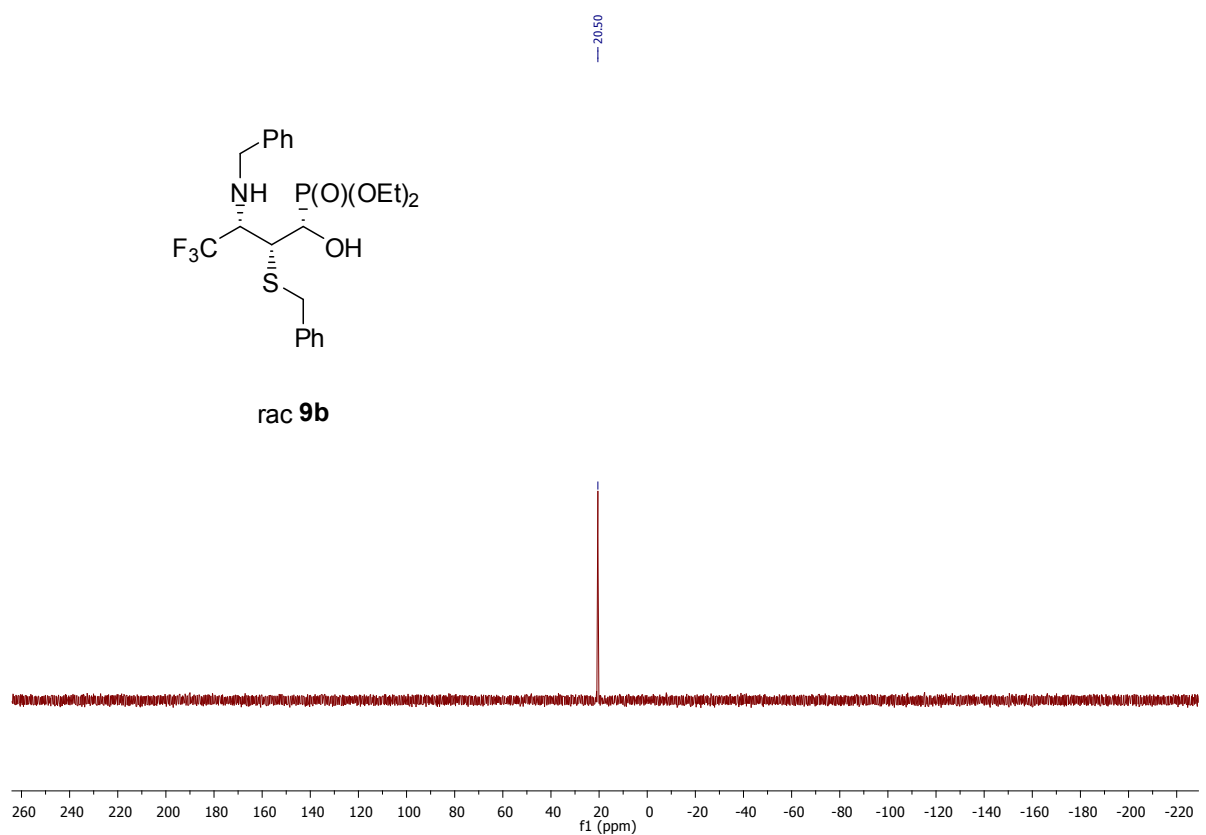

$^{31}\text{P}$  NMR of diethyl 3-(benzylamino)-2-(benzylthio)-4,4,4-trifluoro-1-hydroxybutylphosphonate (**rac 9b**)

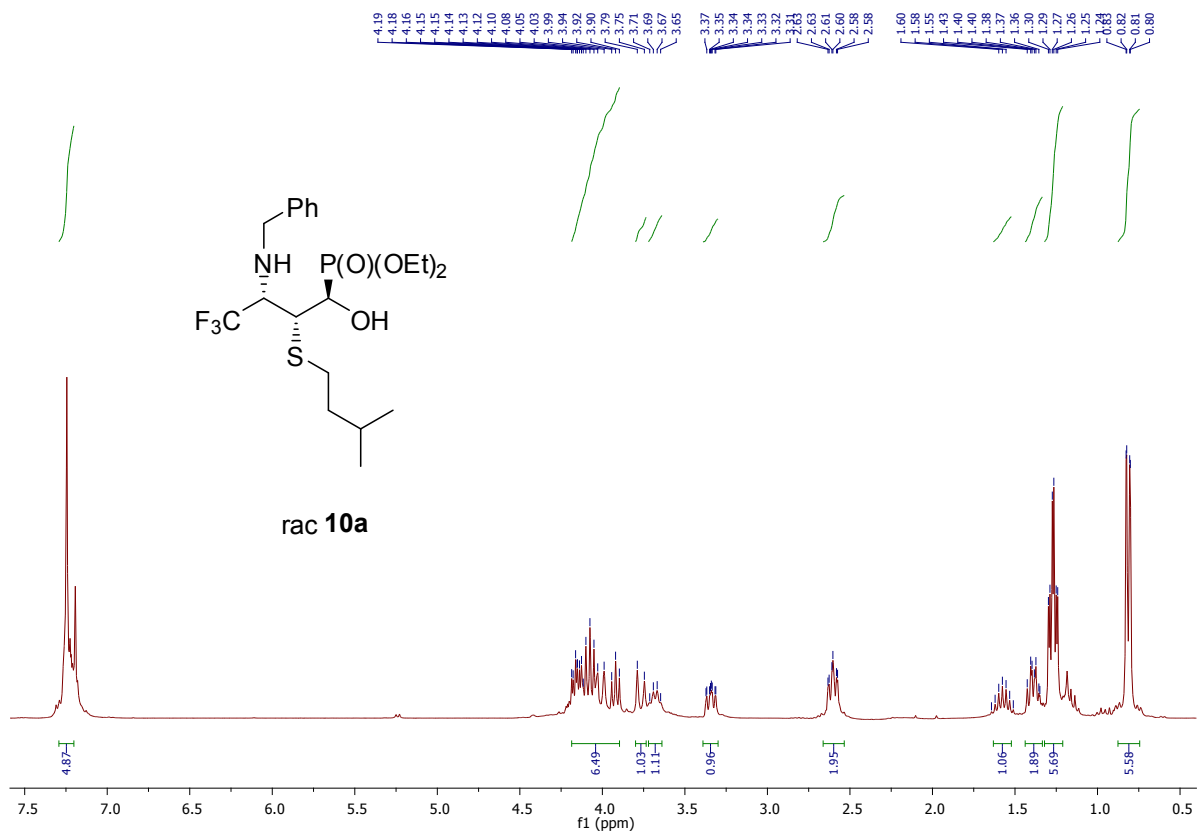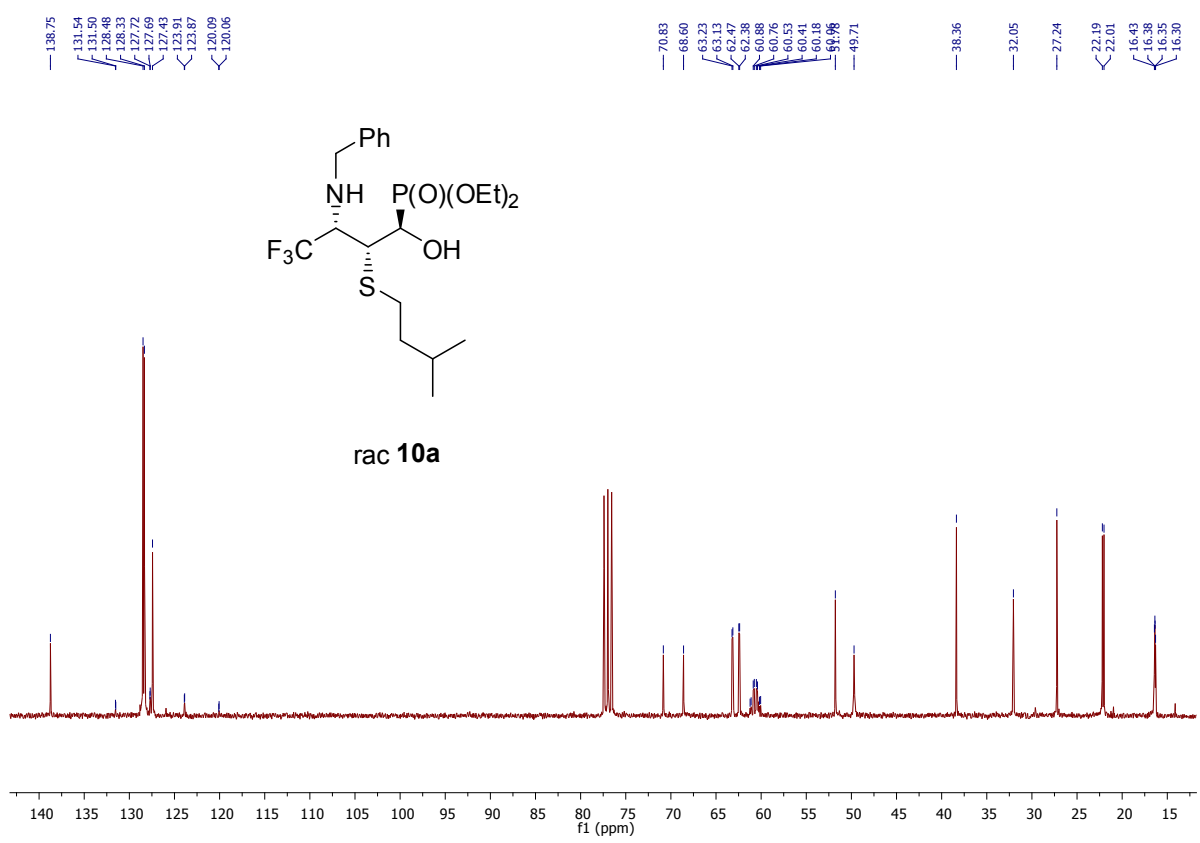

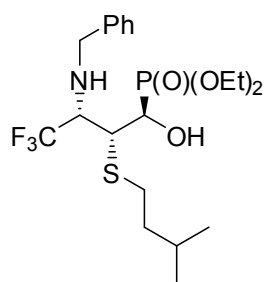

rac 10a

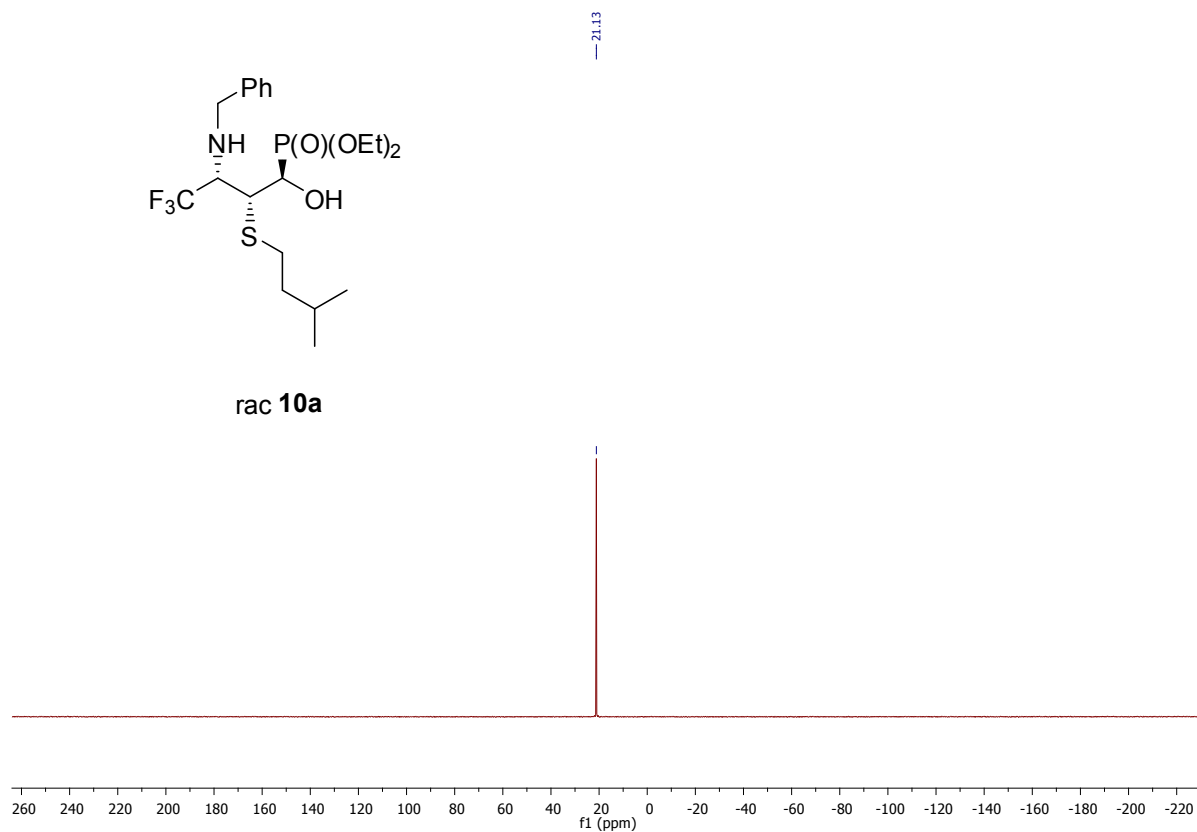

<sup>31</sup>P NMR of diethyl 3-(benzylamino)-4,4,4-trifluoro-1-hydroxy-2-(isopentylthio)butylphosphonate (rac-10a)

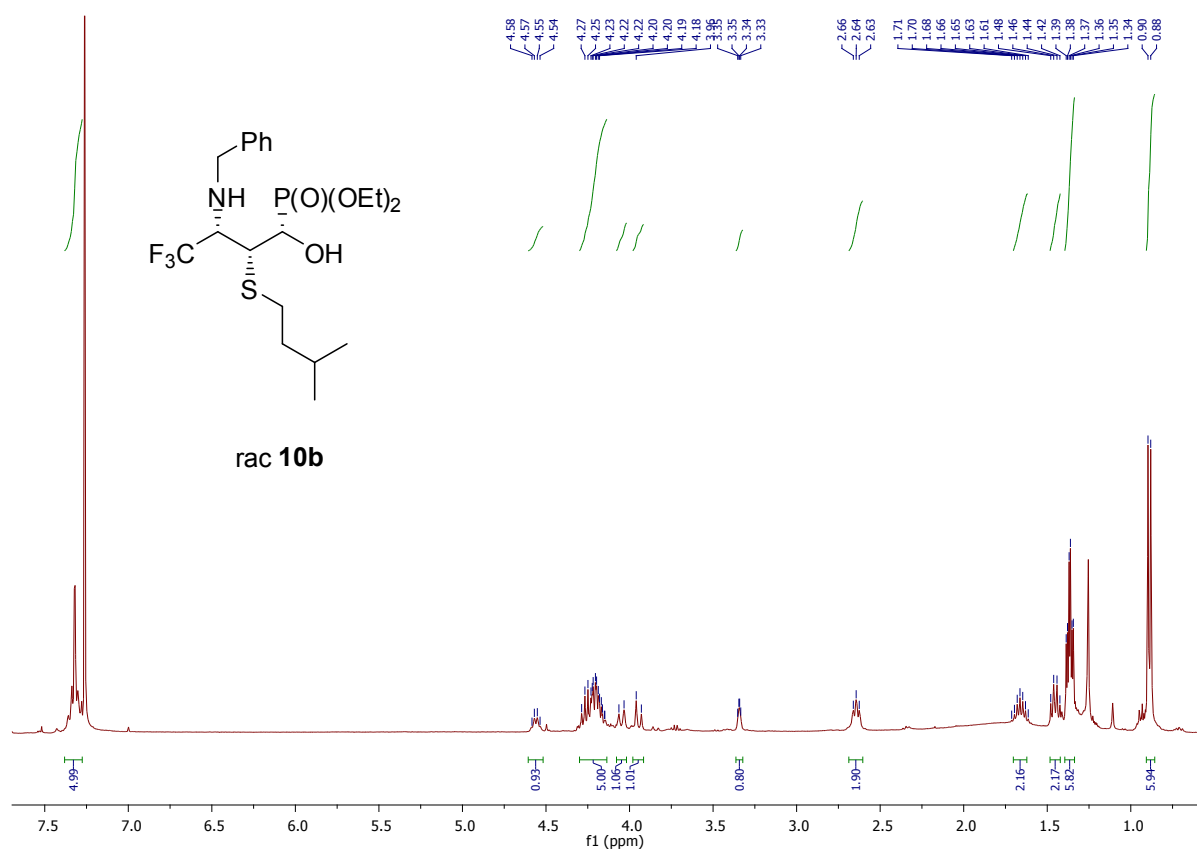

<sup>1</sup>H NMR of diethyl 3-(benzylamino)-4,4,4-trifluoro-1-hydroxy-2-(isopentylthio)butylphosphonate (rac-10b)

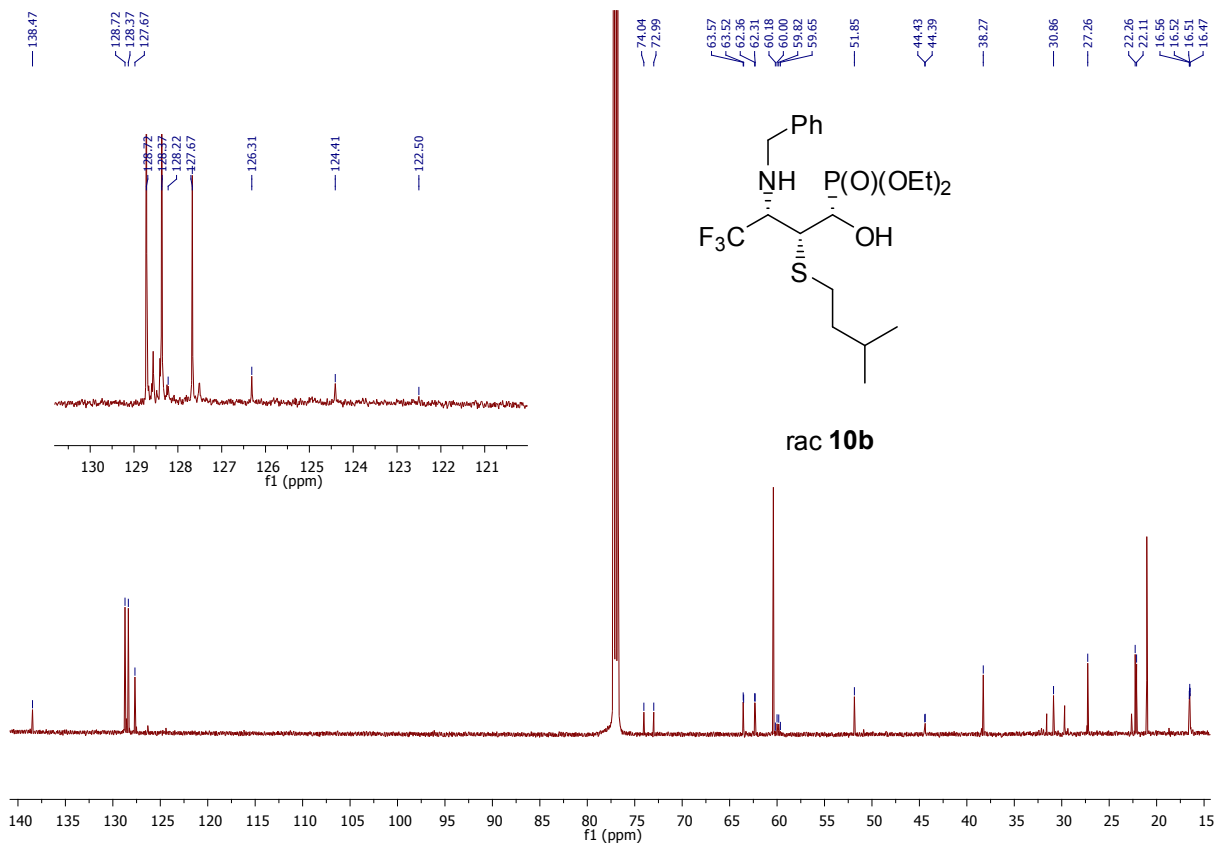

**<sup>13</sup>C NMR of diethyl 3-(benzylamino)-4,4,4-trifluoro-1-hydroxy-2-(isopentylthio)butylphosphonate (rac-10b)**

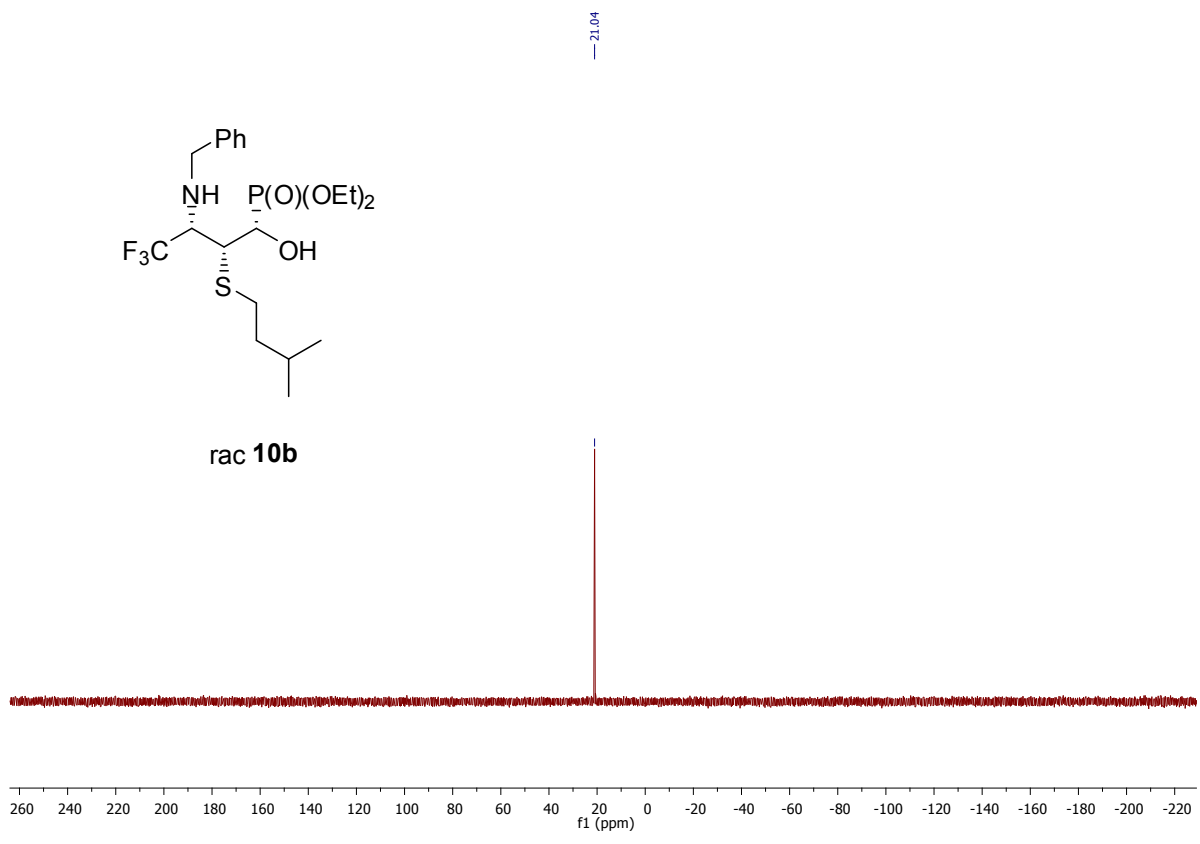

**<sup>31</sup>P NMR of diethyl 3-(benzylamino)-4,4,4-trifluoro-1-hydroxy-2-(isopentylthio)butylphosphonate (rac-10b)**

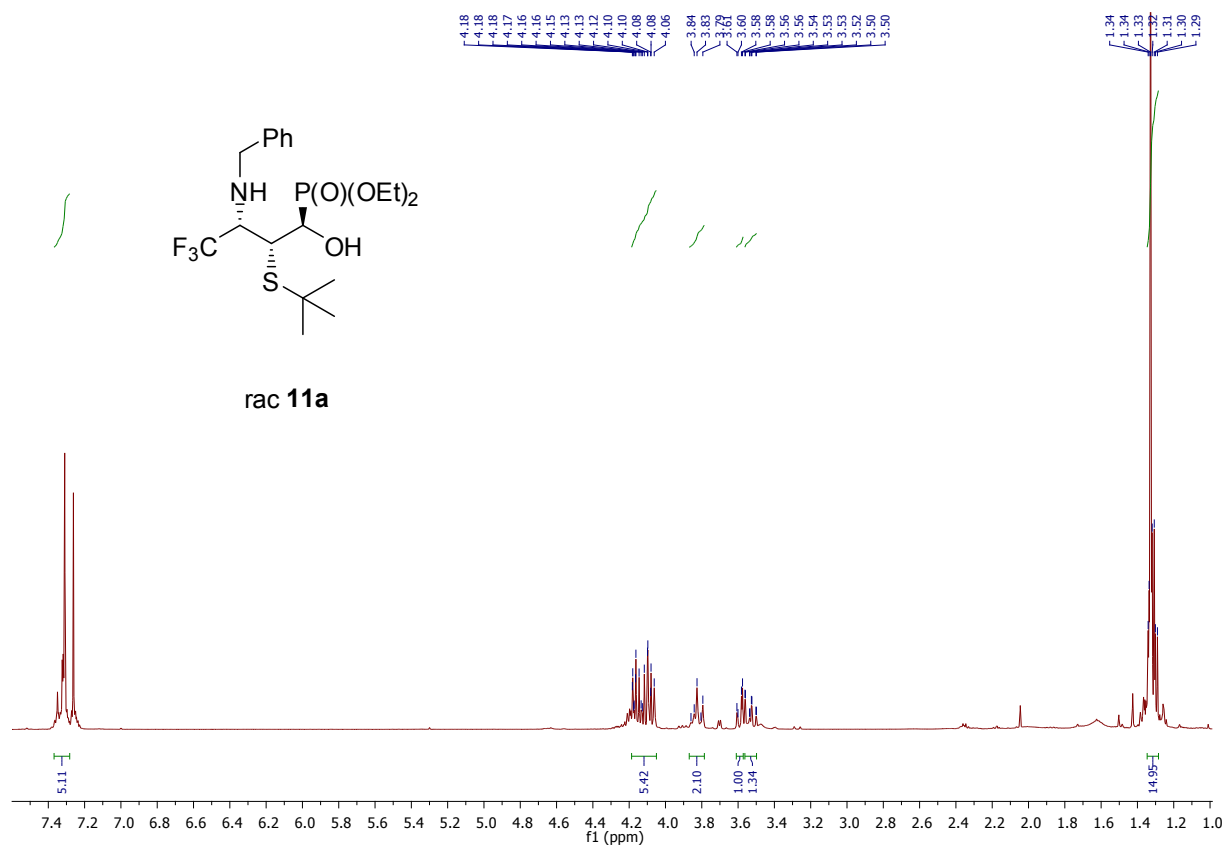

$^1\text{H}$  NMR of diethyl 3-(benzylamino)-2-(tert-butylthio)-4,4,4-trifluoro-1-hydroxybutylphosphonate (**rac 11a**)

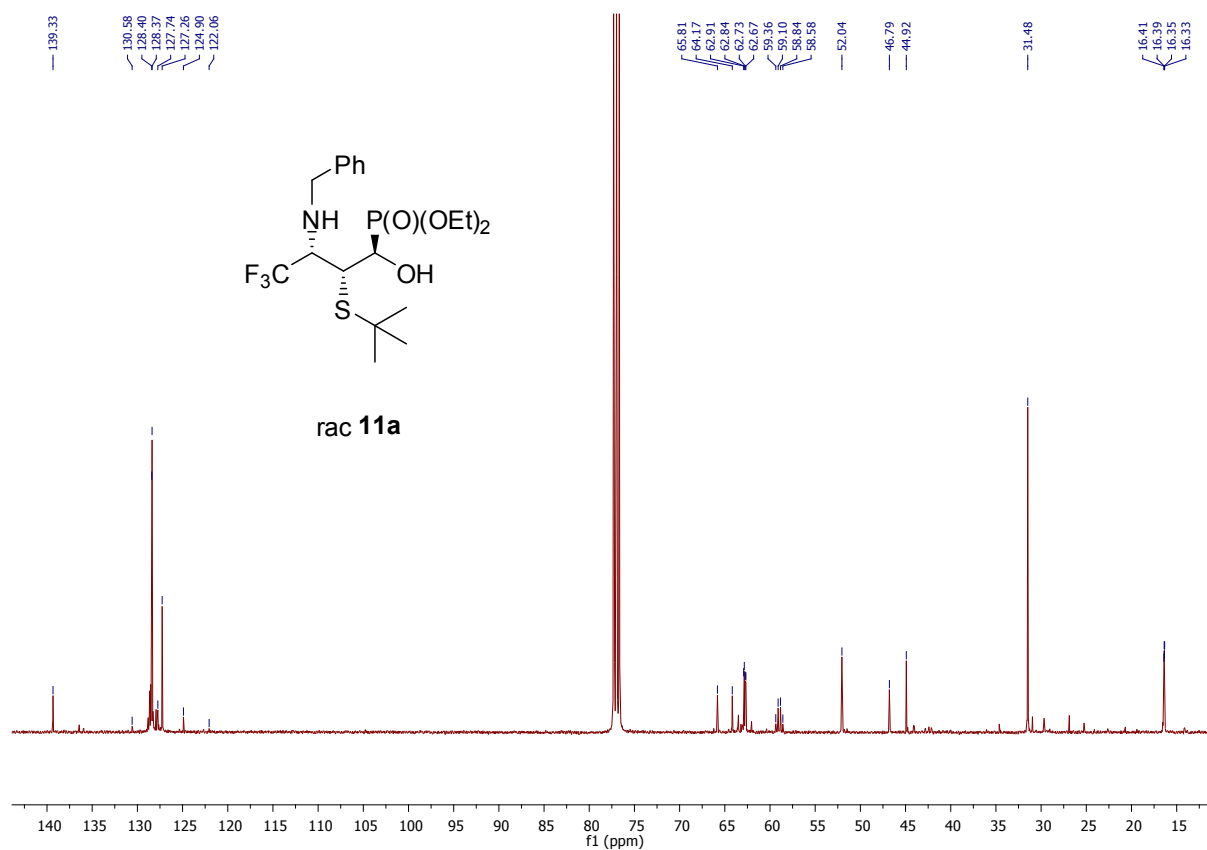

$^{13}\text{C}$  NMR of diethyl 3-(benzylamino)-2-(tert-butylthio)-4,4,4-trifluoro-1-hydroxybutylphosphonate (**rac 11a**)

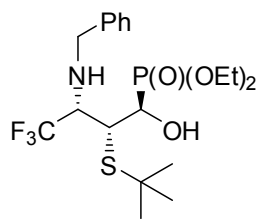

rac 11a

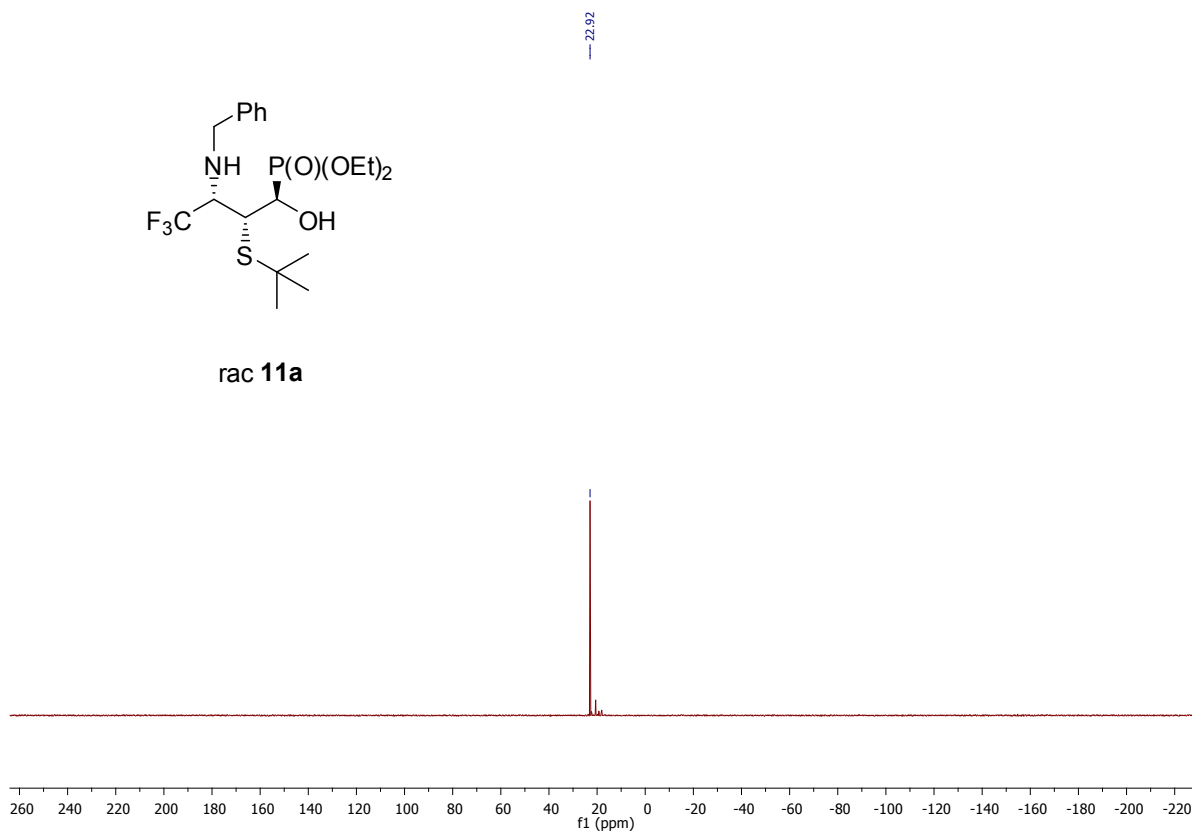

**<sup>31</sup>P NMR of diethyl 3-(benzylamino)-2-(tert-butylthio)-4,4,4-trifluoro-1-hydroxybutylphosphonate (rac 11a)**

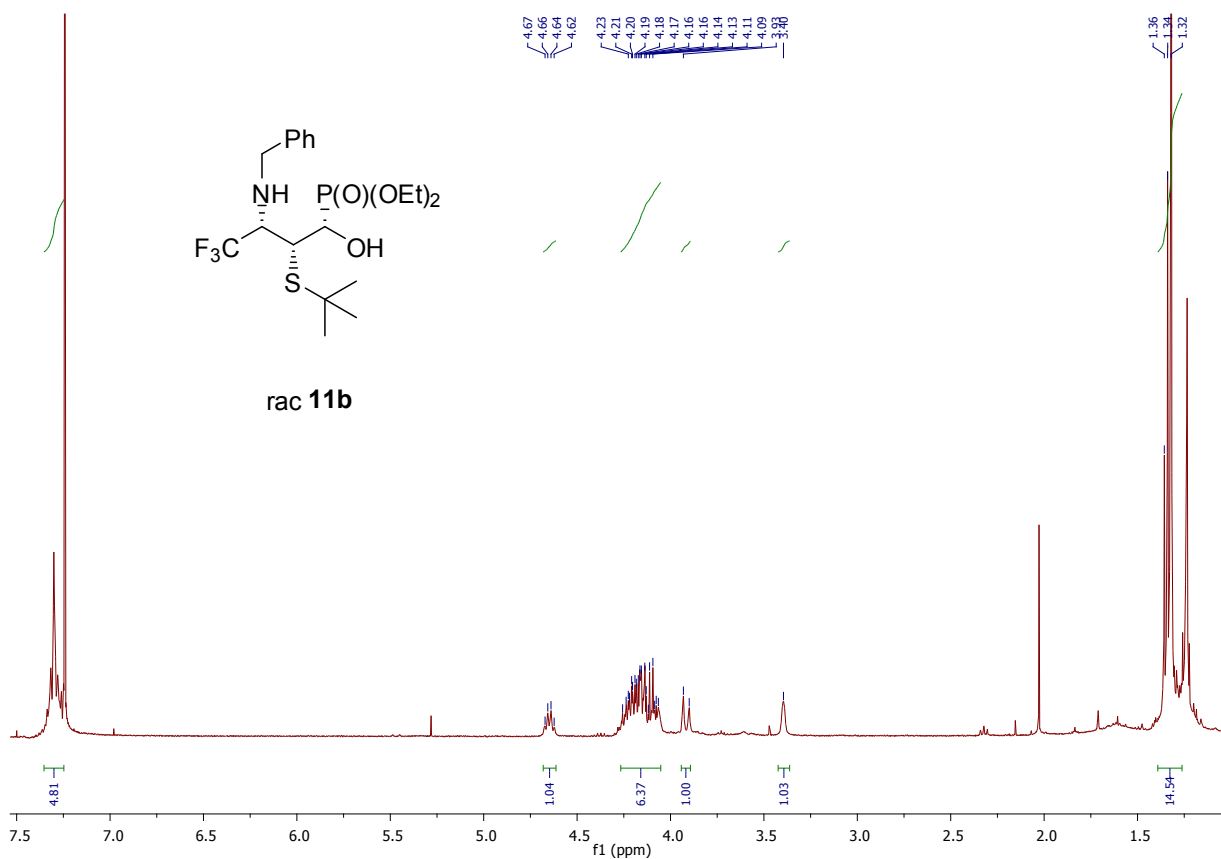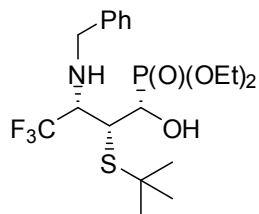

rac 11b

**<sup>1</sup>H NMR of diethyl 3-(benzylamino)-2-(tert-butylthio)-4,4,4-trifluoro-1-hydroxybutylphosphonate (rac 11b)**

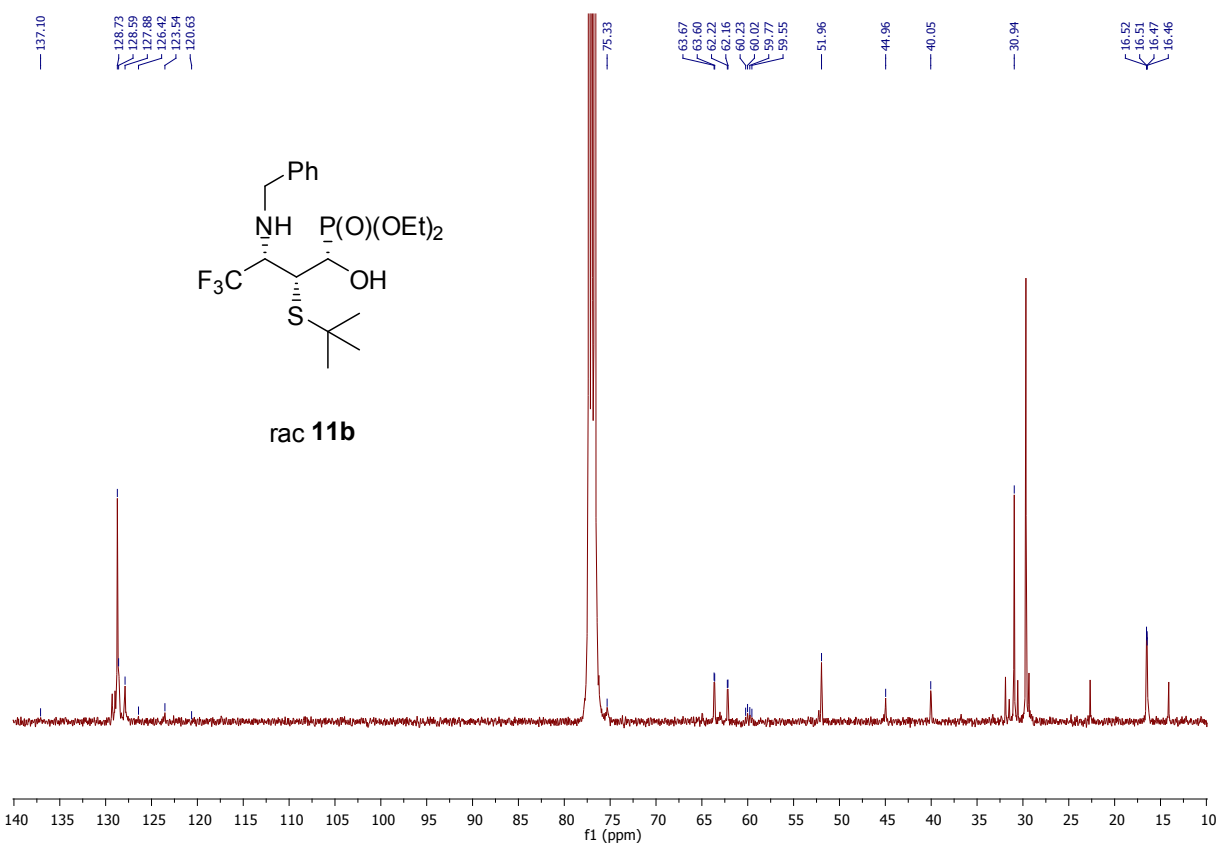

<sup>13</sup>C NMR of diethyl 3-(benzylamino)-2-(tert-butylthio)-4,4,4-trifluoro-1-hydroxybutylphosphonate (**rac 11b**)

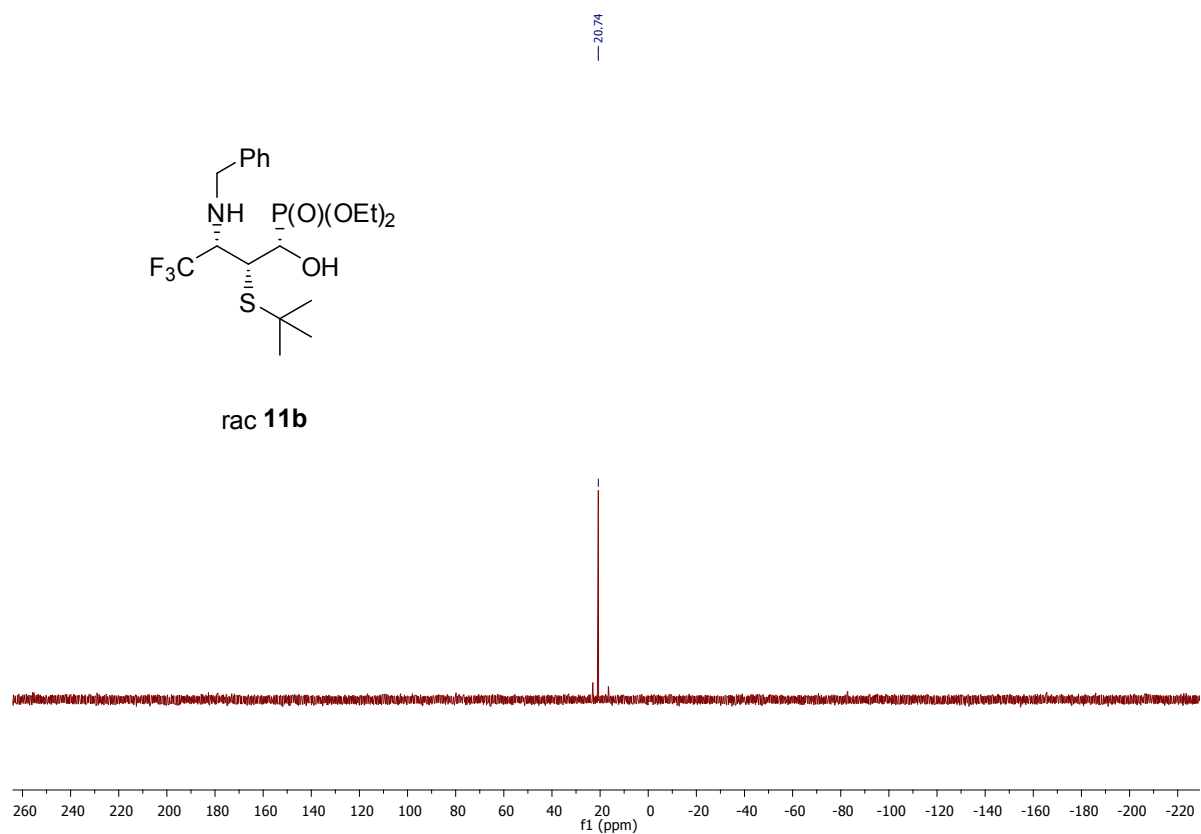

<sup>31</sup>P NMR of diethyl 3-(benzylamino)-2-(tert-butylthio)-4,4,4-trifluoro-1-hydroxybutylphosphonate (**rac 11b**)

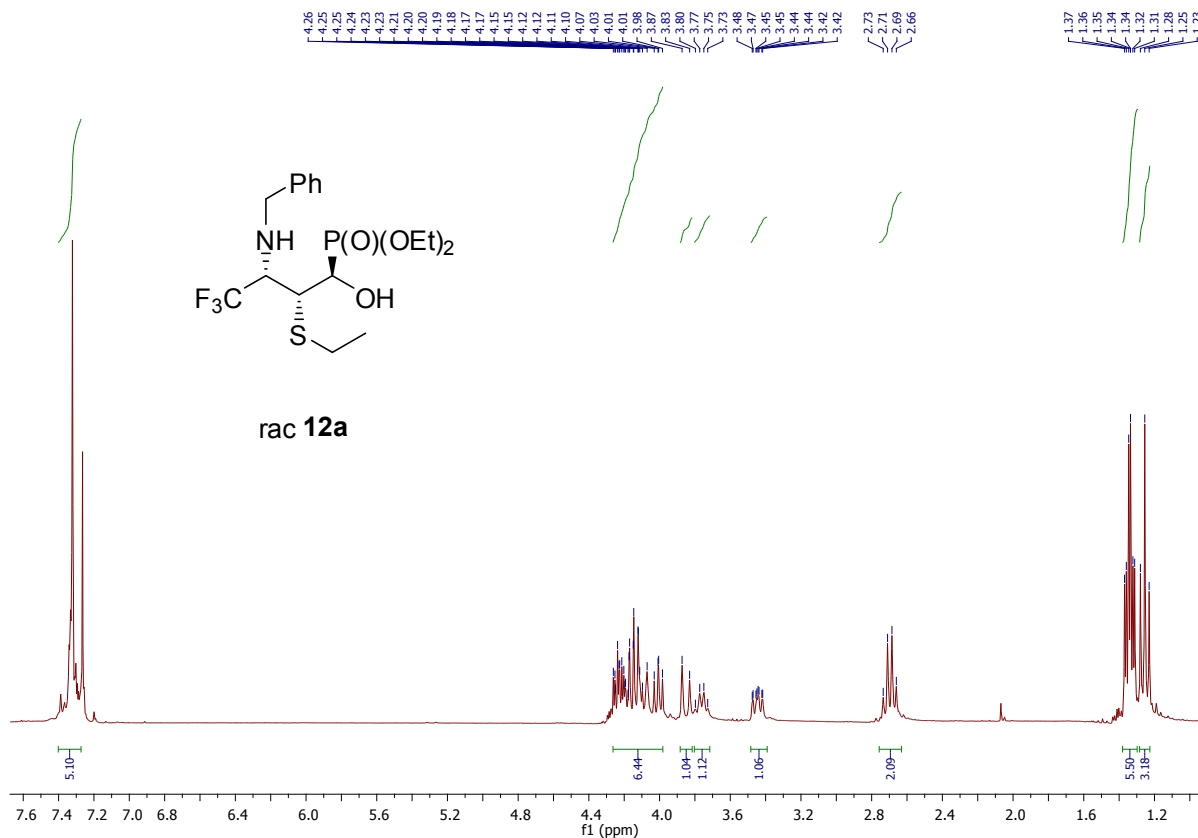

<sup>1</sup>H NMR of diethyl 3-(benzylamino)-2-(ethylthio)-4,4,4-trifluoro-1-hydroxybutylphosphonate (**rac 12a**)

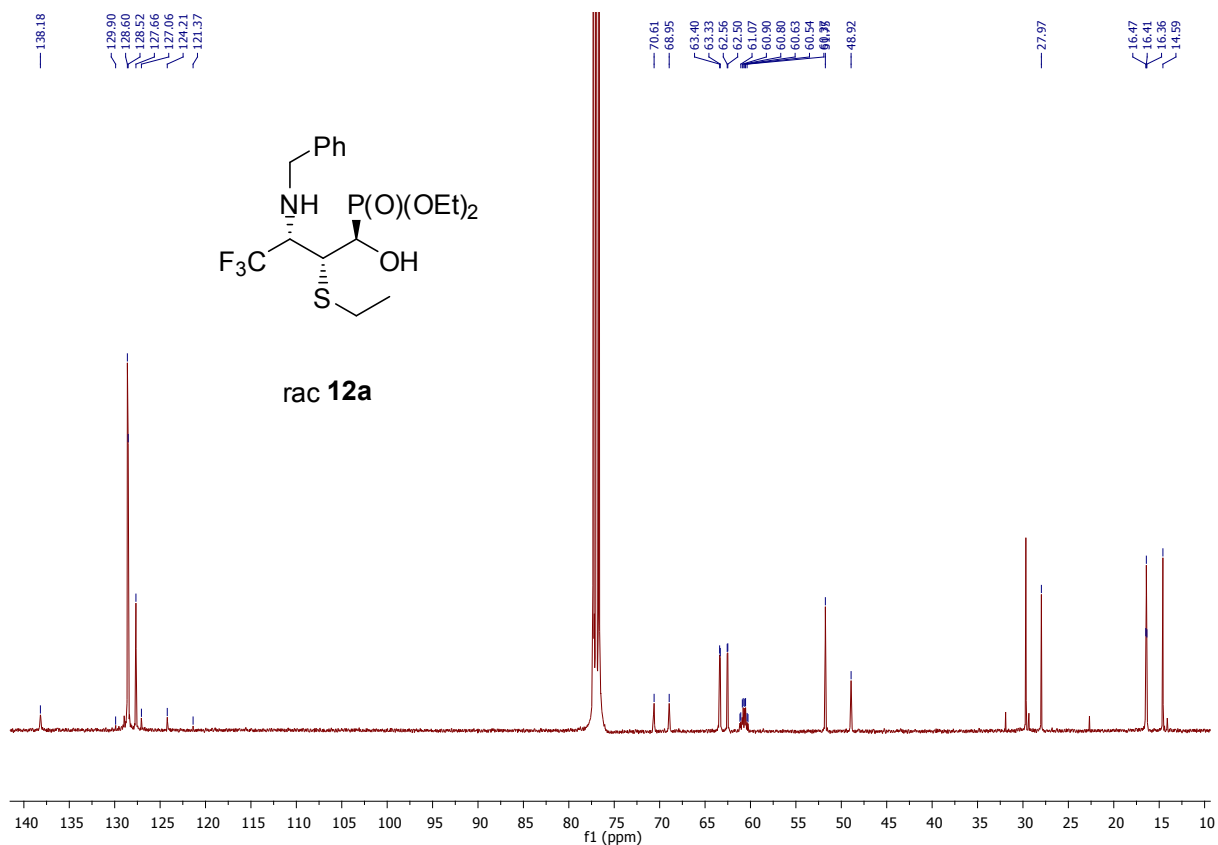

<sup>13</sup>C NMR of diethyl 3-(benzylamino)-2-(ethylthio)-4,4,4-trifluoro-1-hydroxybutylphosphonate (**rac 12a**)



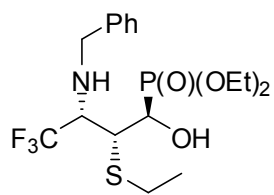

rac 12a

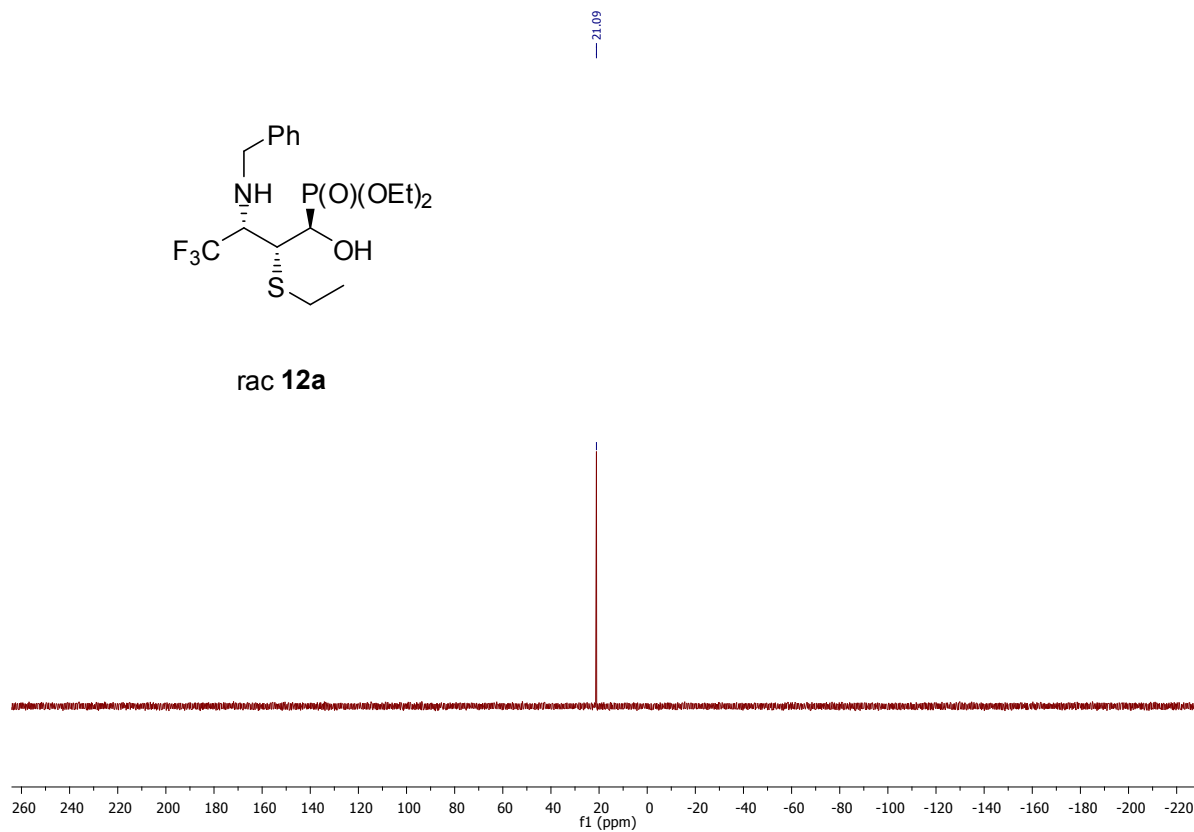

**<sup>31</sup>P NMR of diethyl 3-(benzylamino)-2-(ethylthio)-4,4,4-trifluoro-1-hydroxybutylphosphonate (rac 12a)**

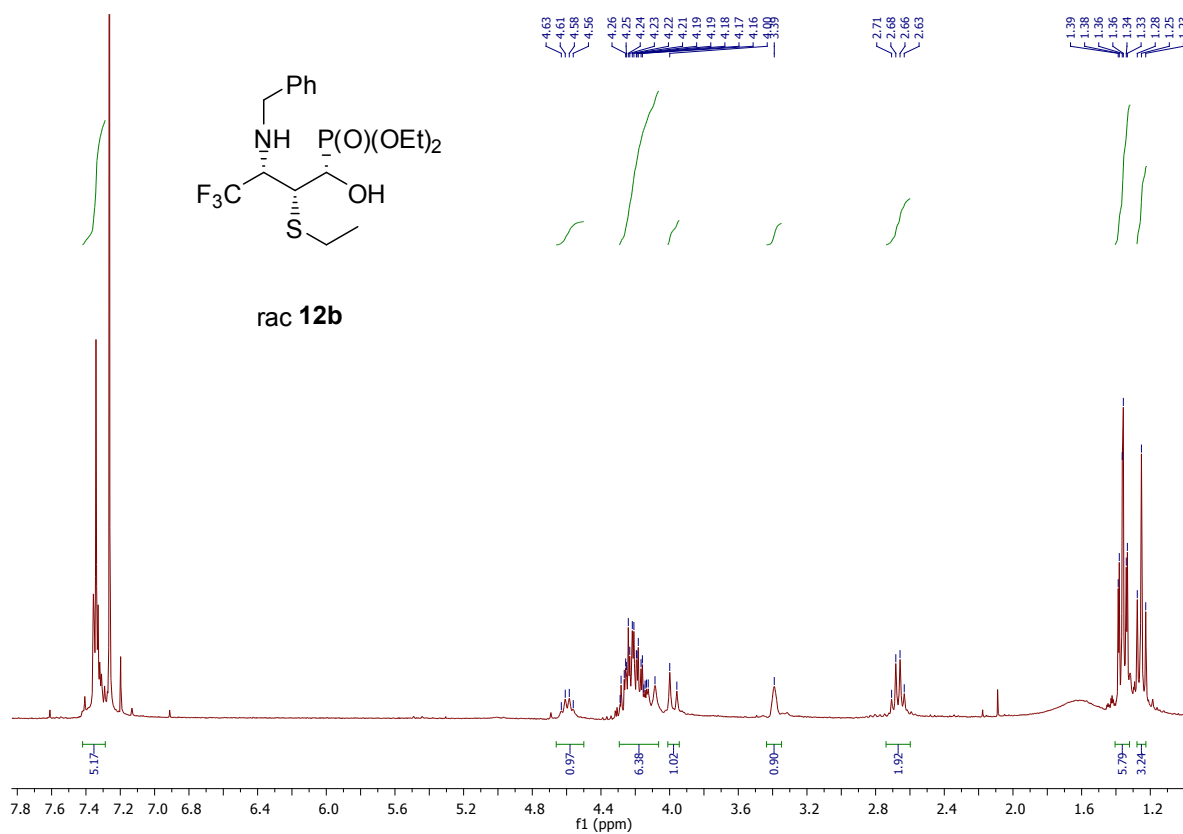

**<sup>1</sup>H NMR of diethyl 3-(benzylamino)-2-(ethylthio)-4,4,4-trifluoro-1-hydroxybutylphosphonate (rac 12b)**

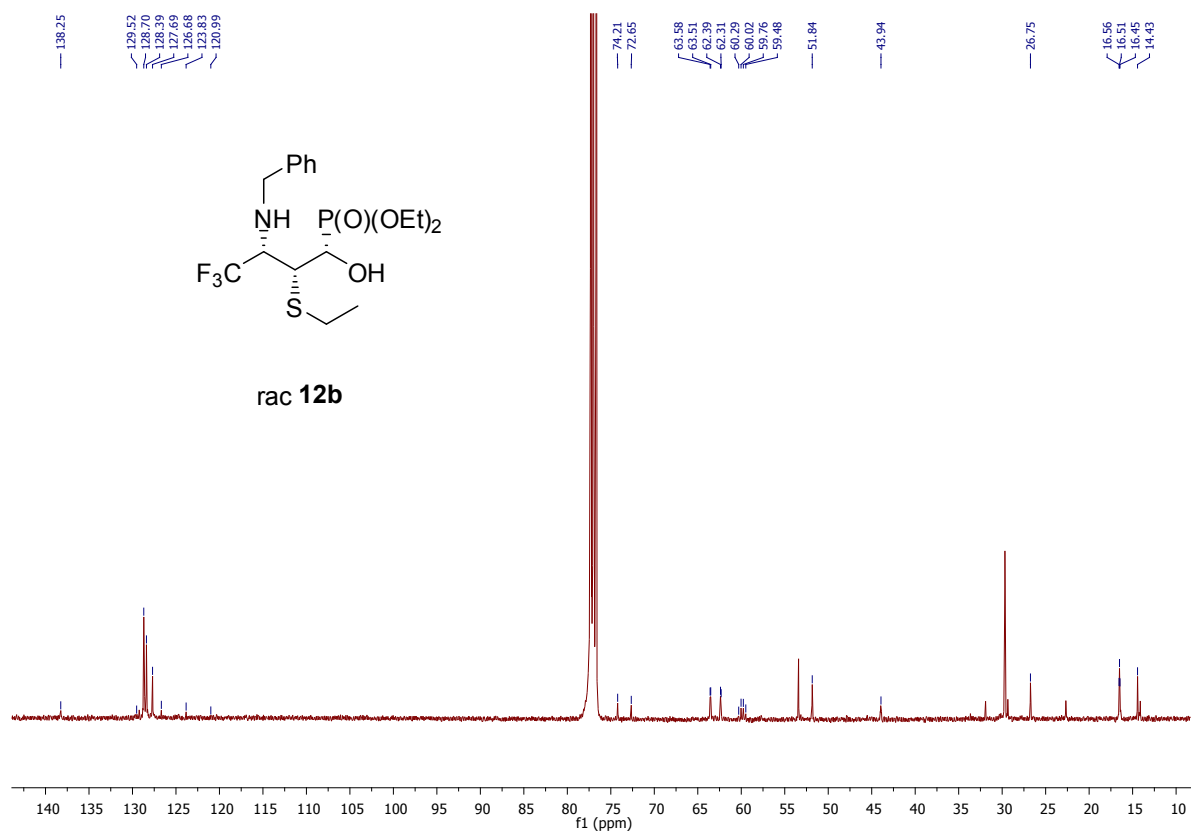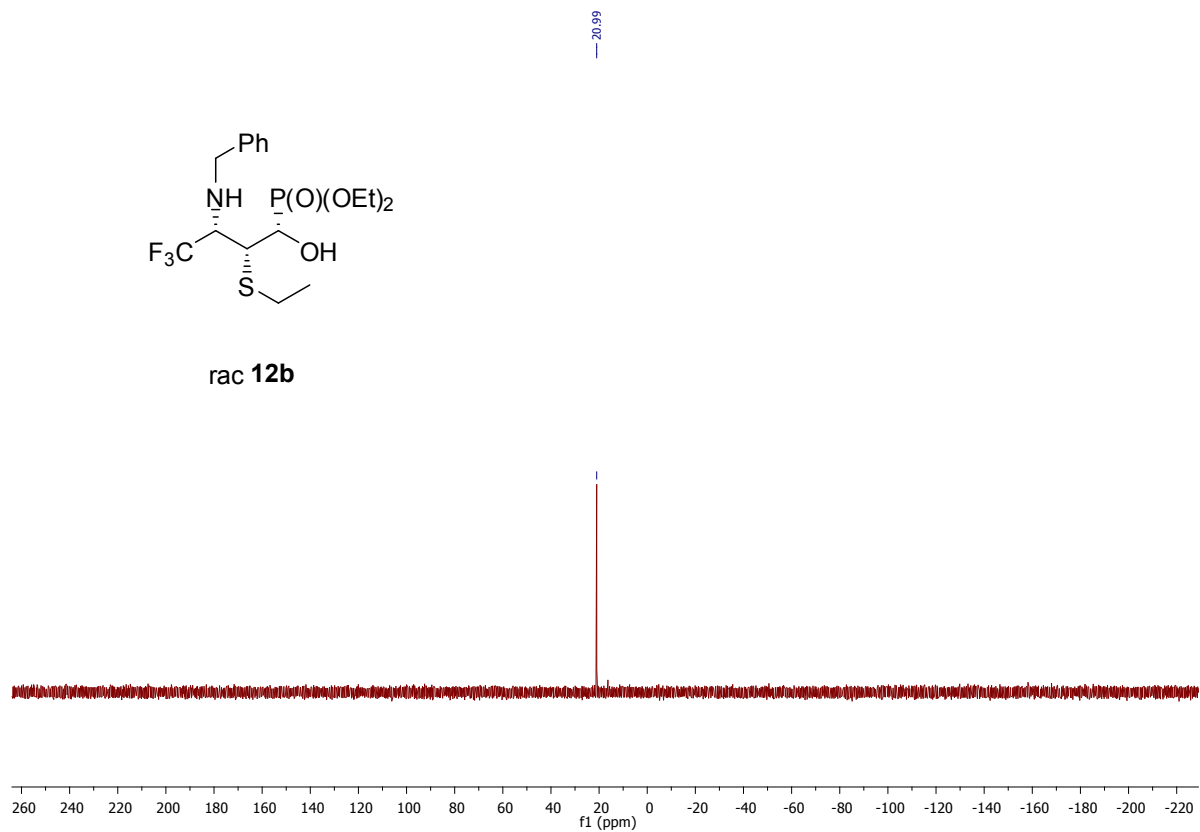

Table 1. Crystal data and refinement details

| Compound                             | <b>4a</b>                                                        | <b>4b</b>                                                        | <b>6a</b>                                                         | <b>8a</b>                                                         |
|--------------------------------------|------------------------------------------------------------------|------------------------------------------------------------------|-------------------------------------------------------------------|-------------------------------------------------------------------|
| Formula                              | C <sub>15</sub> H <sub>21</sub> F <sub>3</sub> NO <sub>4</sub> P | C <sub>15</sub> H <sub>21</sub> F <sub>3</sub> NO <sub>4</sub> P | C <sub>21</sub> H <sub>26</sub> F <sub>4</sub> NO <sub>4</sub> PS | C <sub>21</sub> H <sub>27</sub> F <sub>3</sub> NO <sub>4</sub> PS |
| Formula weight                       | 367.30                                                           | 367.30                                                           | 495.46                                                            | 477.46                                                            |
| Crystal system                       | triclinic                                                        | monoclinic                                                       | triclinic                                                         | monoclinic                                                        |
| Space group                          | P-1                                                              | P2 <sub>1</sub> /c                                               | P-1                                                               | P2 <sub>1</sub> /n                                                |
| a(Å)                                 | 8.4461(6)                                                        | 16.654(4)                                                        | 8.5249(3)                                                         | 8.5794(6)                                                         |
| b(Å)                                 | 10.0719(7)                                                       | 5.0589(13)                                                       | 12.2868(6)                                                        | 12.6291(16)                                                       |
| c(Å)                                 | 12.0079(8)                                                       | 21.395(6)                                                        | 12.5737(11)                                                       | 22.1208(17)                                                       |
| α(°)                                 | 113.979(6)                                                       | 90                                                               | 105.079(6)                                                        | 90                                                                |
| β(°)                                 | 92.730(5)                                                        | 94.15(2)                                                         | 91.166(5)                                                         | 91.615(7)                                                         |
| γ(°)                                 | 92.505(5)                                                        | 90                                                               | 110.256(4)                                                        | 90                                                                |
| V(Å <sup>3</sup> )                   | 930.04(12)                                                       | 1797.8(8)                                                        | 1184.13(13)                                                       | 2395.8(4)                                                         |
| Z                                    | 2                                                                | 4                                                                | 2                                                                 | 4                                                                 |
| d <sub>x</sub> (g cm <sup>-3</sup> ) | 1.31                                                             | 1.36                                                             | 1.39                                                              | 1.32                                                              |
| F(000)                               | 384                                                              | 768                                                              | 516                                                               | 1000                                                              |
| μ(mm <sup>-1</sup> )                 | 0.19                                                             | 0.20                                                             | 2.39                                                              | 2.28                                                              |
| Θ range (°)                          | 3.16 – 25.00                                                     | 3.00 – 25.00                                                     | 3.67 – 75.74                                                      | 4.00 – 75.84                                                      |
| hkl range                            | -9≤h≤10                                                          | -19≤h≤19                                                         | -10≤h≤7                                                           | -10≤h≤10                                                          |
|                                      | -11≤k≤11                                                         | -5≤k≤6                                                           | -14≤k≤15                                                          | -15≤k≤15                                                          |
|                                      | -14≤l≤14                                                         | -25≤l≤22                                                         | -15≤l≤15                                                          | -26≤l≤27                                                          |
| Reflections:                         |                                                                  |                                                                  |                                                                   |                                                                   |
| collected                            | 6013                                                             | 10939                                                            | 9046                                                              | 19491                                                             |
| unique (R <sub>int</sub> )           | 3258 (0.035)                                                     | 3136 (0.181)                                                     | 4747 (0.027)                                                      | 4918 (0.022)                                                      |
| with I>2σ(I)                         | 2126                                                             | 1151                                                             | 4376                                                              | 4091                                                              |
| No. of pars.                         | 223                                                              | 220                                                              | 299                                                               | 290                                                               |
| R(F) [I>2σ(I)]                       | 0.081                                                            | 0.081                                                            | 0.037                                                             | 0.049                                                             |
| wR(F <sup>2</sup> ) [I>2σ(I)]        | 0.237                                                            | 0.173                                                            | 0.094                                                             | 0.137                                                             |
| R(F) [all data]                      | 0.116                                                            | 0.234                                                            | 0.040                                                             | 0.059                                                             |
| wR(F <sup>2</sup> ) [all data]       | 0.267                                                            | 0.221                                                            | 0.097                                                             | 0.145                                                             |
| Goodness of fit                      | 1.07                                                             | 0.88                                                             | 1.05                                                              | 1.03                                                              |
| max/min Δρ (e Å <sup>-3</sup> )      | 0.52/-0.43                                                       | 0.36/-0.31                                                       | 0.34/-0.44                                                        | 0.41/-0.34                                                        |

Table 2. Relevant torsion angles (°) with s.u.'s in parentheses.

|              | <b>4a</b> | <b>4b</b> | <b>6a</b>   | <b>8a</b>   |
|--------------|-----------|-----------|-------------|-------------|
| C2-C1-P1-O11 | -62.1(3)  | 49.9(5)   | -179.78(10) | -179.76(14) |
| P1-C1-C2-C3  | -152.5(4) | 89.1(6)   | 85.09(13)   | 83.84(18)   |
| C1-C2-C3-N3  | 103.7(4)  | 103.8(6)  | 80.06(15)   | 79.1(2)     |
| C2-C3-N3-C4  | 107.4(4)  | 107.5(5)  | -153.06(13) | -151.77(19) |
| C3-N3-C4-C41 | 88.1(5)   | -169.7(5) | 61.14(18)   | 61.5(3)     |
| C1-C2-C3-C31 | -0.6(7)   | 3.8(10)   | -150.86(13) | -151.86(18) |

Table 3. Hydrogen bond data (Å, °) with s.u.'s in parentheses

| D         | H   | A                  | D-H     | H...A   | D...A      | D-H...A   |
|-----------|-----|--------------------|---------|---------|------------|-----------|
| <b>6a</b> |     |                    |         |         |            |           |
| O1        | H1  | O11 <sup>iii</sup> | 0.80(2) | 1.93(2) | 2.7254(18) | 176(2)    |
| N3        | H3N | O11 <sup>ii</sup>  | 0.87(2) | 2.32(2) | 3.1049(17) | 151.5(19) |
| C3        | H3  | O13                | 1.00    | 2.29    | 3.0590(19) | 133       |
| <b>8a</b> |     |                    |         |         |            |           |
| O1        | H1  | O11 <sup>i</sup>   | 0.77(3) | 1.98(3) | 2.736(3)   | 169(3)    |
| N3        | H3N | O11 <sup>ii</sup>  | 0.95(3) | 2.34(3) | 3.204(2)   | 151(2)    |
| C3        | H3  | O12                | 0.98    | 2.28    | 3.054(2)   | 135       |
| <b>4a</b> |     |                    |         |         |            |           |
| O1        | H1  | O11 <sup>v</sup>   | 0.96(5) | 1.73(5) | 2.682(4)   | 170(4)    |
| <b>4b</b> |     |                    |         |         |            |           |
| O1        | H1  | O11 <sup>iv</sup>  | 0.82    | 1.85    | 2.655(5)   | 167       |

Symmetry codes: <sup>i</sup> 2-x,1-y,1-z; <sup>ii</sup> x-1,y,z; <sup>iii</sup> 1-x,1-y,2-z; <sup>iv</sup> x,1+y,z; <sup>v</sup> -x,-y,1-z.
